# Supplementary material for: Direct observation of arene⋯sulphur dioxide interaction: role of metal ions in electronic modulation for binding and activation
Source: Royal Society of Chemistry journal article supplement (doi:10.1039/d4cc02329c), 2024-01-01
Supplement: d4cc02329c1.pdf [file d4cc02329c1.pdf]

**Electronic Supporting Information**

**Direct observation of arene···sulphur dioxide interaction:  
Role of metal ions in electronic modulation for binding  
and activation**

Sandhya Singh,<sup>a</sup> Shruthi Dinesh,<sup>a</sup> Archana Yadav,<sup>a</sup> Sakthi Raje,<sup>a</sup> Ray J. Butcher,<sup>b</sup> Mahesh Sundararajan<sup>\*c</sup> and Raja Angamuthu<sup>\*ad</sup>

## Table of Contents

|                                                                                                                       |    |
|-----------------------------------------------------------------------------------------------------------------------|----|
| Figure S 1. $^1\text{H}$ NMR of 2-(anthracenyl)benzothiazoline (H-L) in $\text{CDCl}_3$ .....                         | 11 |
| Figure S 2. $^{13}\text{C}$ NMR of 2-(anthracenyl)benzothiazoline (H-L) in $\text{CDCl}_3$ .....                      | 12 |
| Figure S 3. ESI-MS of 2-(anthracenyl)benzothiazoline.....                                                             | 13 |
| Figure S 4. Simulated for $[\text{C}_{21}\text{H}_{16}\text{NS}]^+$ .....                                             | 14 |
| Figure S 5. $^1\text{H}$ NMR of 2-(anthracenyl)benzothiazolium bisulfate in $\text{CDCl}_3$ .....                     | 15 |
| Figure S 6. ESI-MS (in positive mode) after reacting HL with $\text{SO}_2$ .....                                      | 16 |
| Figure S 7. Simulated for $[\text{C}_{21}\text{H}_{14}\text{NS}]^+$ .....                                             | 17 |
| Figure S 8. ESI-MS (in negative mode)after reacting HL with $\text{SO}_2$ .....                                       | 18 |
| Figure S 9. Simulated for $[\text{HSO}_4]$ .....                                                                      | 19 |
| Figure S 10. $^1\text{H}$ NMR of $[\text{NiL}_2]$ in $\text{CDCl}_3$ .....                                            | 20 |
| Figure S 11. Stacked $^1\text{H}$ NMR of $[\text{NiL}_2] \cdot 2\text{SO}_2$ (top) and $[\text{NiL}_2]$ (bottom)..... | 21 |
| Figure S 12. $^1\text{H}$ NMR of $[\text{ZnL}_2]$ in $\text{CDCl}_3$ .....                                            | 22 |
| Figure S 13. ESI-MS (in positive mode) after reacting $[\text{ZnL}_2]$ with $\text{SO}_2$ .....                       | 23 |
| Figure S 14. Simulated for $[\text{C}_{21}\text{H}_{14}\text{NS}]^+$ .....                                            | 24 |
| Figure S 15. ESI-MS (in negative mode) after reacting $[\text{ZnL}_2]$ with $\text{SO}_2$ .....                       | 25 |
| Figure S 16. Simulated for $[\text{HSO}_4]$ .....                                                                     | 26 |
| Figure S 17. $^1\text{H}$ NMR of $[\text{CdL}_2]$ in $\text{CDCl}_3$ .....                                            | 27 |
| Figure S 18. ESI-MS (in positive mode) after reacting $[\text{CdL}_2]$ with $\text{SO}_2$ .....                       | 28 |
| Figure S 19. Simulated for $[\text{C}_{21}\text{H}_{14}\text{NS}]^+$ .....                                            | 29 |
| Figure S 20. ESI-MS (in negative mode) after reacting $[\text{CdL}_2]$ with $\text{SO}_2$ .....                       | 30 |
| Figure S 21. Simulated for $[\text{HSO}_4]$ .....                                                                     | 31 |
| Figure S 22. UV-vis spectrum of 0.01mM $[\text{HL}]$ and 0.01mM $[\text{LHSO}_4]$ in DCM at RT .....                  | 32 |
| Figure S 23. UV-Vis spectrum of $[\text{NiL}_2]$ (0.00735 mM in DCM).....                                             | 33 |
| Figure S 24. UV-Vis spectrum of $[\text{ZnL}_2]$ (0.00735 mM in DCM).....                                             | 34 |
| Figure S 25. UV-Vis spectrum of $[\text{CdL}_2]$ (0.00735 mM in DCM) .....                                            | 35 |
| Figure S 26. UV-Vis spectrum of $[\text{NiL}_2]$ , $[\text{CdL}_2]$ and $[\text{NiL}_2]$ .....                        | 36 |

|                                                                                                  |    |
|--------------------------------------------------------------------------------------------------|----|
| Figure S 27. Cyclic Voltammetry (CV) of [NiL <sub>2</sub> ]                                      | 37 |
| Figure S 28. Thermogravimetric analysis of [NiL <sub>2</sub> ] $\cdot$ 2SO <sub>2</sub>          | 38 |
| Figure S 29. FT-IR for [NiL <sub>2</sub> ] and [NiL <sub>2</sub> ] $\cdot$ 2SO <sub>2</sub>      | 39 |
| Figure S 30. ORTEP of [NiL <sub>2</sub> ] drawn at 50% probability                               | 40 |
| Figure S 31. ORTEP of [ZnL <sub>2</sub> ] drawn at 50% probability                               | 41 |
| Figure S 32. ORTEP of [CdL <sub>2</sub> ] drawn at 50% probability                               | 42 |
| Figure S 33. ORTEP of [NiL <sub>2</sub> ] $\cdot$ 2SO <sub>2</sub> drawn at 50% probability      | 43 |
| Table S 1. Crystallographic data for [NiL <sub>2</sub> ]                                         | 44 |
| Table S 2. Crystallographic data for [ZnL <sub>2</sub> ]                                         | 45 |
| Table S 3. Crystallographic data for [CdL <sub>2</sub> ]                                         | 46 |
| Table S 4. Crystallographic data for [NiL <sub>2</sub> ] $\cdot$ 2SO <sub>2</sub>                | 47 |
| Figure S 34. Optimized structures and computed SO <sub>2</sub> free energies                     | 48 |
| Figure S 35. Superposition of Zn- and Cd-optimized structures on the [NiL <sub>2</sub> ] complex | 49 |
| Figure S 36. Optimized structures of Ni-complex in singlet (S=0) and triplet (S=1)               | 50 |
| Figure S 37. Highest Occupied Molecular Orbital (HOMO) of SO <sub>2</sub>                        | 51 |
| Table S 5. Optimized coordinates (in Å) of Ni, Zn and Cd complexes                               | 52 |

## EXPERIMENTAL SECTION

### Materials.

2-Aminobenzenethiol (SDFCL), 9-Anthracenecarboxaldehyde (Sigma-Aldrich),  $\text{Zn}(\text{OAc})_2 \cdot 2\text{H}_2\text{O}$  (Rankem),  $\text{Cd}(\text{OAc})_2 \cdot 2\text{H}_2\text{O}$  (Merck), and  $\text{SO}_2$  cylinder (6 Sigma gases) were used as received from commercial sources. Solvents were distilled under dry nitrogen atmosphere using conventional methods.

### Methods.

Elemental analyses were carried out on a PerkinElmer CHNS/O analyzer. NMR spectra were recorded on JEOL 500 MHz and JEOL 400 MHz spectrometers. The temperature was kept constant using a variable-temperature unit within the error limit of  $\pm 1$  K. The software MestReNova was used for the processing of the NMR spectra. Tetramethylsilane (TMS) or the deuterated solvent residual peaks were used for calibration. Mass spectrometry measurements were performed on Agilent 6546 LC/Q-TOF system equipped with an electrospray interface. Spectra were collected by constant infusion of the sample dissolved in methanol or acetonitrile with 0.1% formic acid.

### Computational Details.

Both geometry optimizations and harmonic vibrational frequency calculations are carried out with TURBOMOLE 7.2 electronic structure program (TURBOMOLE V7.2, **2017**, a development of University of Karlsruhe and Forschungszentrum Karlsruhe GmbH, 1989-2015, TURBOMOLE GmbH, since 2007, available from <http://www.turbomole.com>). We have used B3LYP functional (Becke, A. D.; Density-functional thermochemistry. III. The role of exact exchange, *J. Chem. Phys.*, **1993**, 98, 5648-5652, Lee, C.; Yang, W.; Parr, R. G.; Development of the Colle-Salvetti correlation-energy formula into a functional of the electron density, *Phys. Rev. B.* **1988**, 37, 785-789) in conjunction with def2-TZVP basis set (Schaefer, A.; Huber, C.; Ahlrichs, R., Fully optimized contracted Gaussian basis sets of triple zeta valence quality for atoms Li to Kr, *J. Chem. Phys.* **1994**, 100, 5829-5835) for all atoms. Throughout the calculations, we have used D3 correction (Grimme, S.; Antony, J.; Ehrlich, S.; Krieg, H. A Consistent and Accurate Ab Initio Parametrization of Density Functional Dispersion Correction (DFT-D) for the 94 Elements H-Pu, *J. Chem. Phys.* **2010**, 132, 154104) with Becke-Johnson damping factor (D3-BJ) Grimme, S.; Ehrlich, S.; Goerigk, L. Effect of Damping Function in Dispersion Corrected Density Functional Theory, *J.*



*Comput. Chem.* **2011**, *32* (11), 1456-1465. We have used this computational strategy to understand the electronic structure for several systems (*Phys. Chem. Chem. Phys.*, 2007, *9*, 2498-2506, *Inorg. Chem.* 2019, *58*, 6184, *Inorg. Chem.* 2019, *58*, 6257).

### X-ray crystallography

Single-crystal X-ray data were collected on a Bruker SMART APEX CCD diffractometer using graphite-monochromated Mo K $\alpha$  radiation ( $\lambda = 0.71069 \text{ \AA}$ ). The linear absorption coefficients, the scattering factors for the atoms, and the anomalous dispersion corrections were taken from International Tables for X-ray Crystallography. Data integration and reduction were conducted with SAINT. An empirical absorption correction was applied to the collected reflections with SADABS during data processing with the SAINT routine in Apex2. The lattice parameters and structural data are provided as tables at the end of this Supporting Information.

### Synthesis of 2-(anthracenyl)benzothiazoline (H-L)

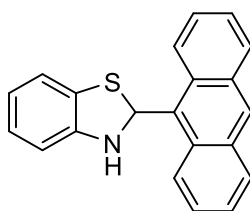

In a 100 mL Schlenk flask 9-Anthracenecarboxaldehyde (206 mg, 1 mmol) was dissolved in dry ethanol (3 mL) under N<sub>2</sub> atmosphere. In this ethanolic solution, 2-aminothiophenol (125 mg, 1 mmol) was slowly injected with vigorous stirring. The homogeneous solution was stirred at room temperature for 6 h under N<sub>2</sub> atmosphere. The yellow colour precipitate was formed and it was filtered. Yield: 190 mg (60.6%). <sup>1</sup>H NMR (500 MHz, CDCl<sub>3</sub>, 25 °C)  $\delta_{\text{H}}$ = 8.78 (d,  $J = 8.6$  Hz, 2H), 8.51 (s, 1H), 8.16 (d,  $J = 3.9$  Hz, 1H), 8.06 – 8.03 (m, 2H), 7.53 – 7.46 (m, 4H), 7.18 (d,  $J = 7.6$  Hz, 1H), 7.04 (t,  $J = 8.3$  Hz, 1H), 6.87 (t,  $J = 8.1$  Hz, 1H), 6.72 (d,  $J = 8.7$  Hz, 1H), 4.47 (s, 1H). <sup>13</sup>C NMR (101 MHz, CDCl<sub>3</sub>, 25 °C)  $\delta_{\text{C}}$ = 146.61, 131.68, 130.70, 130.06, 129.52, 127.98, 127.90, 126.21, 125.82, 125.12, 124.41, 122.13, 121.05, 110.50, 65.63. ESI-MS:  $m/z = 314.1005$  (calcd.314.1003) = [C<sub>21</sub>H<sub>16</sub>NS]<sup>+</sup>. Anal.Calcd (%) for (C<sub>21</sub>H<sub>15</sub>NS): C 80.48, H 4.82, N 4.47, S 10.23; found: C 79.56, H 4.93, N 4.38, S 10.11.

## Synthesis of [NiL<sub>2</sub>]

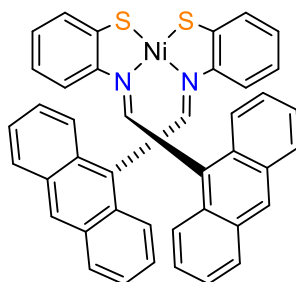

In a 100 mL Schlenk flask 9-Anthracenecarboxaldehyde (206 mg, 1 mmol) was dissolved in dry ethanol (3 mL) under N<sub>2</sub> atmosphere. In this ethanolic solution, 2-aminothiophenol (125 mg, 1 mmol) was slowly injected with vigorous stirring. The yellow colour solution was refluxed at 80 °C for 30 mins. Then nickel(II) acetate tetrahydrate (124 mg, 0.5 mmol) in ethanol (20 mL) was added to this solution under nitrogen atmosphere. The reaction mixture was refluxed at 80 °C for 2 h under nitrogen atmosphere. The dark reddish brown precipitate was formed and it was filtered. Then the precipitate was washed by cold ethanol (10 mL) and dried under vacuum. Yield: 240 mg (70%). X-ray quality needle-like brown colour crystals were obtained in CHCl<sub>3</sub> layering with methanol at -22 °C in 4 days. <sup>1</sup>H NMR (400 MHz, CDCl<sub>3</sub>, 25 °C): δ<sub>H</sub> = 11.70 (d, *J* = 7.2 Hz, 2H), 8.54 (s, 2H), 8.22 (s, 2H), 8.00 (d, *J* = 16.1 Hz, 4H), 7.73 – 7.68 (m, 3H), 7.39 – 7.32 (m, 3H), 7.11 (d, *J* = 8.0 Hz, 2H), 6.83 (t, *J* = 7.3 Hz, 2H), 6.79 – 6.72 (m, 2H), 6.53 (t, *J* = 8.0 Hz, 2H), 6.17 (d, *J* = 7.6 Hz, 2H), 5.67 (d, *J* = 7.8 Hz, 2H). Anal. Calcd (%) for (C<sub>42</sub>H<sub>28</sub>N<sub>2</sub>NiS<sub>2</sub>): C 73.80, H 4.13, N 4.10; found: C 72.78, H 3.83, N 4.10.

## Synthesis of [ZnL<sub>2</sub>]

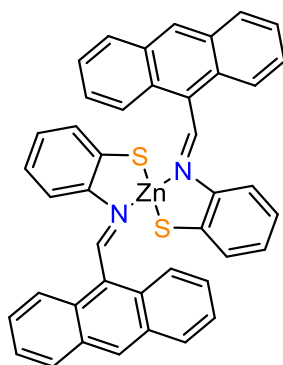

In a 100 mL Schlenk flask 9-Anthracenecarboxaldehyde (412 mg, 2mmol) was dissolved in dry ethanol (3 mL) under N<sub>2</sub> atmosphere. In this ethanolic solution, 2-aminothiophenol (250 mg, 1 mmol) was slowly injected with vigorous stirring. The yellow colour solution was refluxed at 80 °C for 30 mins. Then zinc(II) acetate dihydrate (219 mg, 1mmol) in ethanol (20 mL) was added to this solution under nitrogen atmosphere. The reaction mixture was refluxed at 80 °C for 2 h under nitrogen atmosphere. Dark orange colour precipitate was formed and it was filtered and dried under vacuum. Yield: 600 mg (87%). X-ray quality needle-like redcolour crystals were obtained in CHCl<sub>3</sub> diffused by diethylether at 5 °C in 2 days. <sup>1</sup>H NMR (400 MHz, CDCl<sub>3</sub>, 25 °C): δ<sub>H</sub> = 9.51 (s, 3H), 8.46 (s, 3H), 7.52 – 7.43 (m, 8H), 6.89 – 6.61 (m, 14H). Anal. Calcd (%) for (C<sub>42</sub>H<sub>28</sub>N<sub>2</sub>ZnS<sub>2</sub>·0.5CH<sub>3</sub>CH<sub>2</sub>OCH<sub>2</sub>CH<sub>3</sub>): C 72.67, H 4.57, N 3.85; found: C 71.99, H 3.69, N 3.97.

## Synthesis of [CdL<sub>2</sub>]

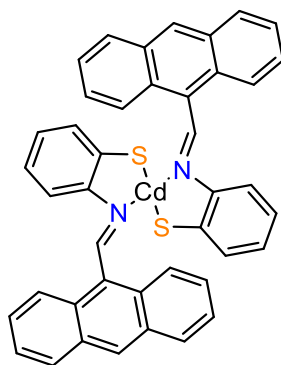

In a 100 mL Schlenk flask 9-Anthracenecarboxaldehyde (206 mg, 1mmol) was dissolved in dry ethanol (3 mL) under N<sub>2</sub> atmosphere. In this ethanolic solution, 2-aminothiophenol (125 mg, 1 mmol) was slowly injected with vigorous stirring. The yellow colour solution was refluxed at 80 °C for 30 mins. Then cadmium(II) acetate dihydrate (133 mg, 0.5mmol) in ethanol (20 mL) was added to this solution under nitrogen atmosphere. The reaction mixture was refluxed at 80 °C for 2 h under nitrogen atmosphere. Yellow colour precipitate was formed and it was filtered and dried under vacuum. Yield: 200 mg (54.2%). X-ray quality needle-like red colour crystals were obtained in CHCl<sub>3</sub> diffused by diethylether at 5 °C in 2 days. <sup>1</sup>H NMR (400 MHz, CDCl<sub>3</sub>, 25 °C): δ<sub>H</sub> = 9.38 (s, 2H), 8.41 (s, 2H), 8.13 (d, *J* = 8.6 Hz, 4H), 7.93 (d, *J* = 8.3 Hz, 4H), 7.54 – 7.44 (m, 4H), 7.41 – 7.34 (m, 4H), 7.03 – 6.69 (m, 8H). Anal. Calcd (%) for (C<sub>42</sub>H<sub>28</sub>N<sub>2</sub>CdS<sub>2</sub>): C 68.43, H 3.83, N 3.80; found: C 67.64, H 3.54, N 4.25.

### Interaction of 2-(anthracenyl)benzothiazoline with SO<sub>2</sub>

Pale yellow powder of 2-(anthracenyl)benzothiazoline (100 mg, 0.3 mmol) was dissolved in dry dichloromethane (7 mL) and purged SO<sub>2</sub> for 20 min at room temperature. While purging SO<sub>2</sub>, color of solution changed from yellow to red. The solution was kept standing at -20 °C and the precipitate formed overnight was filtered and dried. Yield: 65 mg (52%)<sup>1</sup>H NMR (500 MHz, CDCl<sub>3</sub>, 25 °C): δ<sub>H</sub> = 11.55 (s, 1H), 8.64 (s, 1H), 8.08 (d, J = 8.4 Hz, 3H), 7.82 (d, J = 8.5 Hz, 2H), 7.66 – 7.60 (m, 1H), 7.58 – 7.43 (m, 6H). ESI-MS: *m/z* (cation mode) = 312.0848 (calcd. 312.0847) = 2-(anthracenyl)benzothiazoliumcation ; *m/z* (anion mode) = 96.9597 (calcd. 96.9596) = [HSO<sub>4</sub>]

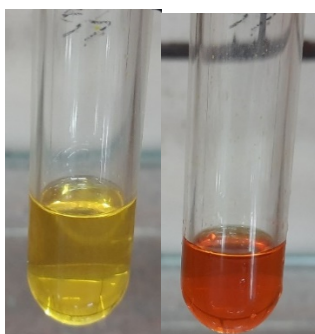

### Interaction of [NiL<sub>2</sub>] with SO<sub>2</sub>

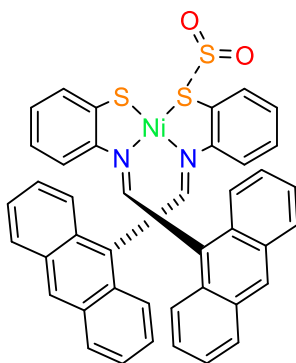

In a 15 mL Schlenk tube reddish brown powder of [NiL<sub>2</sub>] (57 mg, 0.08mmol) was dissolved in dry dichloromethane (5 mL). Then sulphur dioxide is purged in this reddish brown solution for 5 min at room temperature. Then the solution was kept at -20 °C. Red colour crystals were formed in 7 days. Yield: 13 mg (20%).

### Interaction of [ZnL<sub>2</sub>] with SO<sub>2</sub>

Red color crystals of [Zn(Anbt)<sub>2</sub>] (30 mg, 0.043 mmol) were dissolved in dry dichloromethane (8 mL) and purged SO<sub>2</sub> for 20 min at room temperature. While purging SO<sub>2</sub>, color of solution changed from red to yellow. ESI-MS:  $m/z$  (cation mode) = 312.0841 (calcd. 312.0847) = 2-(anthracenyl)benzothiazoliumcation.  $m/z$  (anion mode) = 96.9599 (calcd. 96.9596) = [HSO<sub>4</sub>]

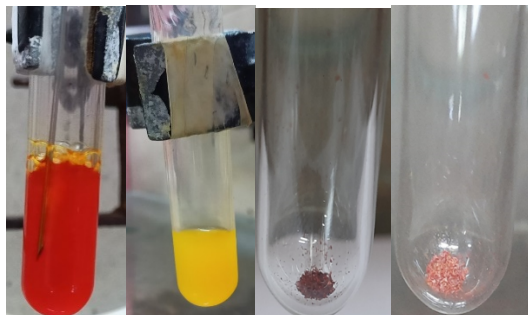

### Interaction of [CdL<sub>2</sub>] with SO<sub>2</sub>

Red color crystals of [CdL<sub>2</sub>] (30 mg, 0.040 mmol) were dissolved in dry dichloromethane (8 mL) and purged SO<sub>2</sub> for 20 min at room temperature. While purging SO<sub>2</sub>, color of solution changed from red to yellow. ESI-MS:  $m/z$  (cation mode) = 312.0840 (calcd. 312.0847) = 2-(anthracenyl)benzothiazoliumcation.  $m/z$  (anion mode) = 96.9597 (calcd. 96.9596) = [HSO<sub>4</sub>]

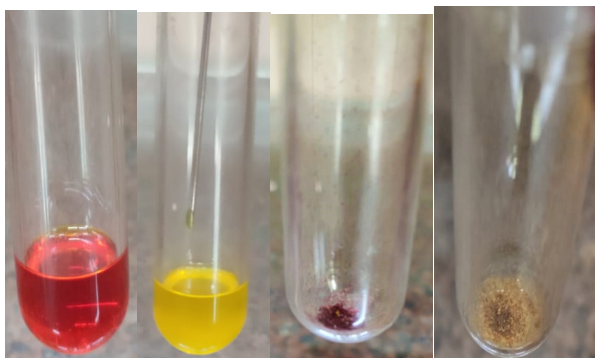

Figure S 1.  $^1\text{H}$  NMR of 2-(anthracenyl)benzothiazoline (HL) in  $\text{CDCl}_3$ .

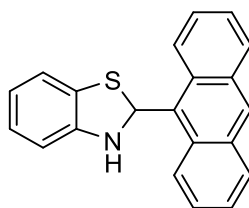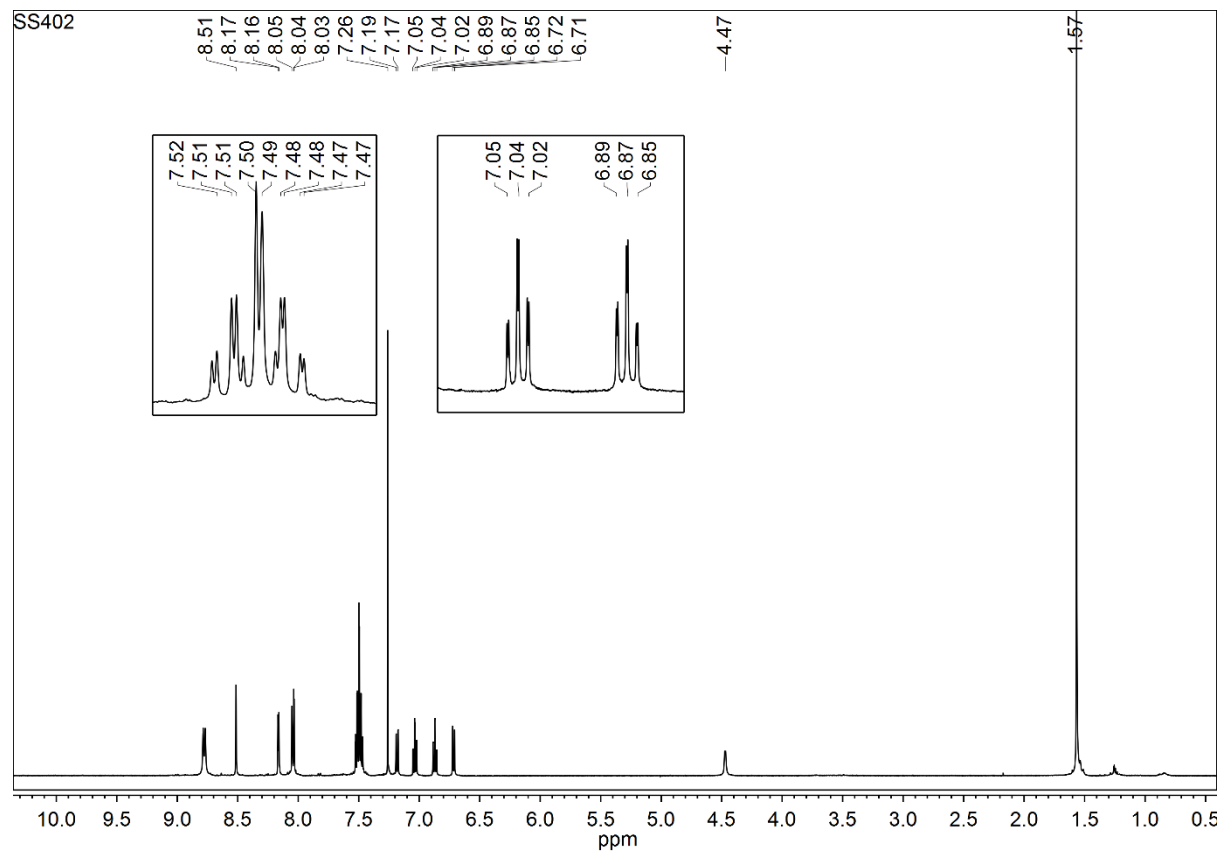

Figure S 2.  $^{13}\text{C}$  NMR of 2-(anthracenyl)benzothiazoline (HL) in  $\text{CDCl}_3$ .

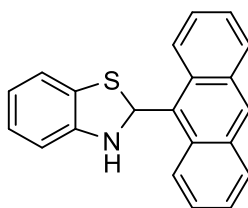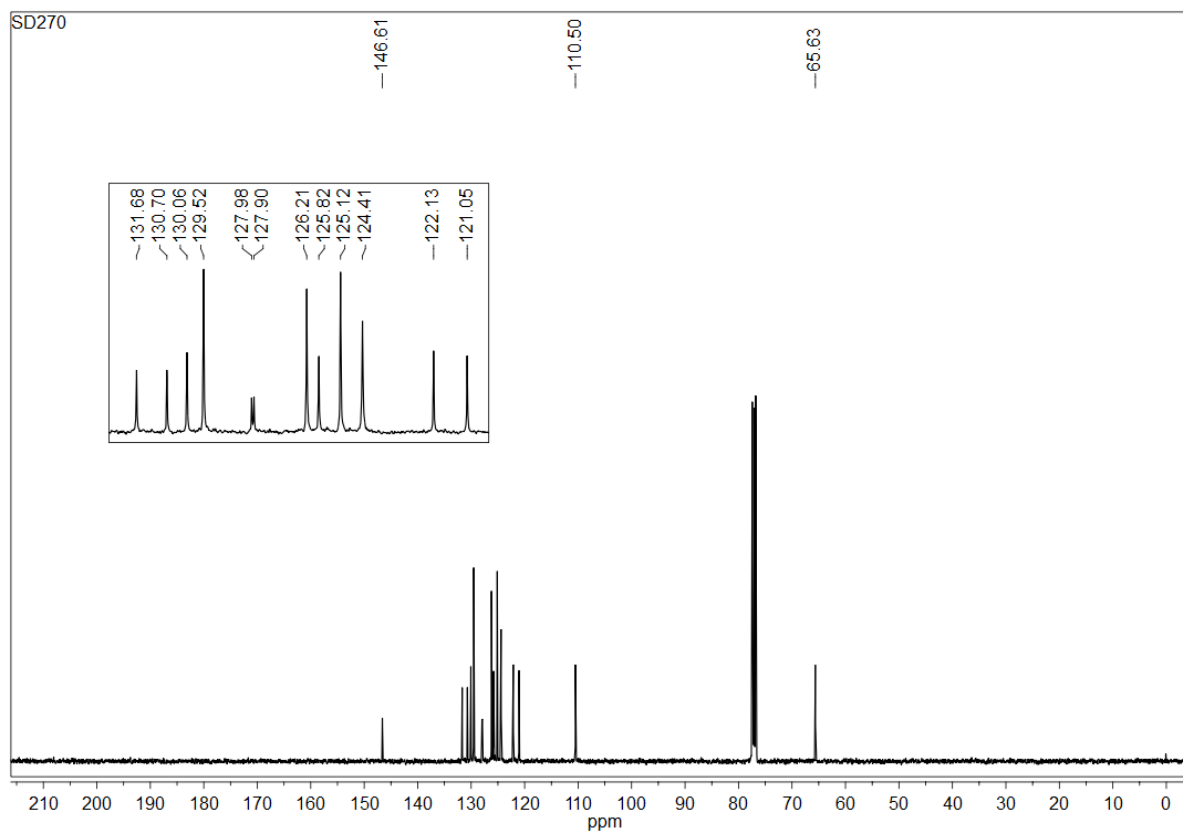



Figure S 3. ESI-MS of 2-(anthracenyl)benzothiazoline.

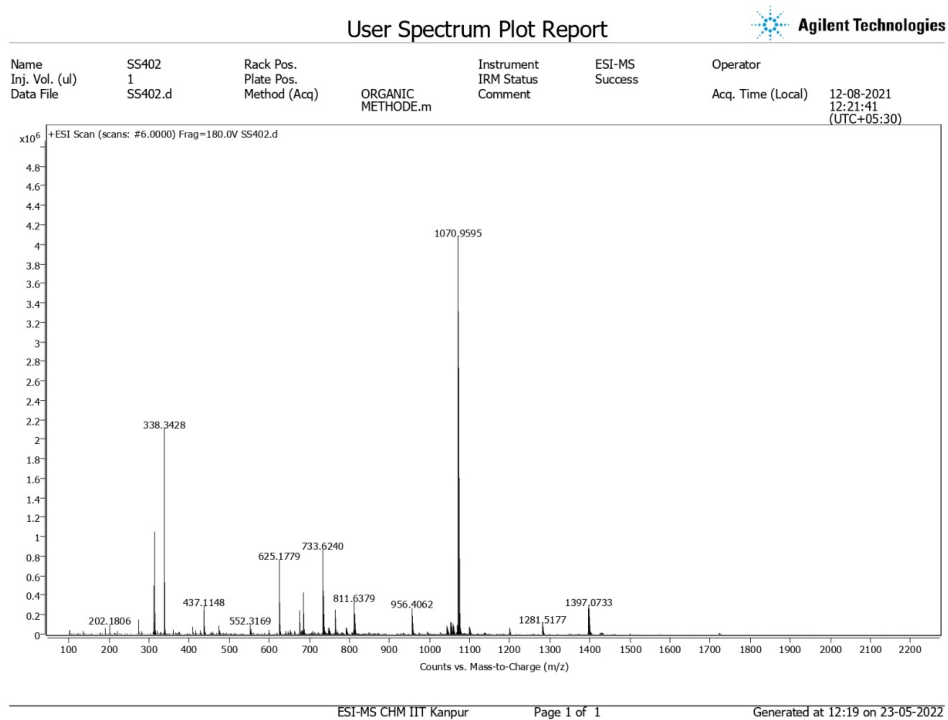

Calculated  $m/z$  for  $[L+H]^+ = [C_{21}H_{16}NS]^+ = 314.1003$ ; observed  $m/z = 314.1005$

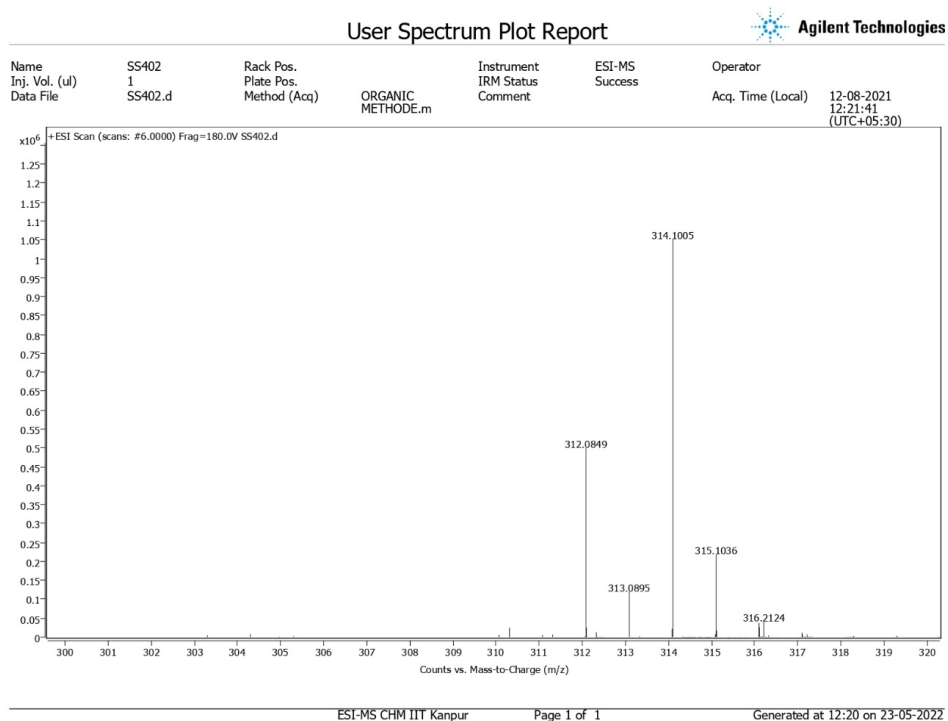

Figure S 4. Simulated for  $[C_{21}H_{16}NS]^+$

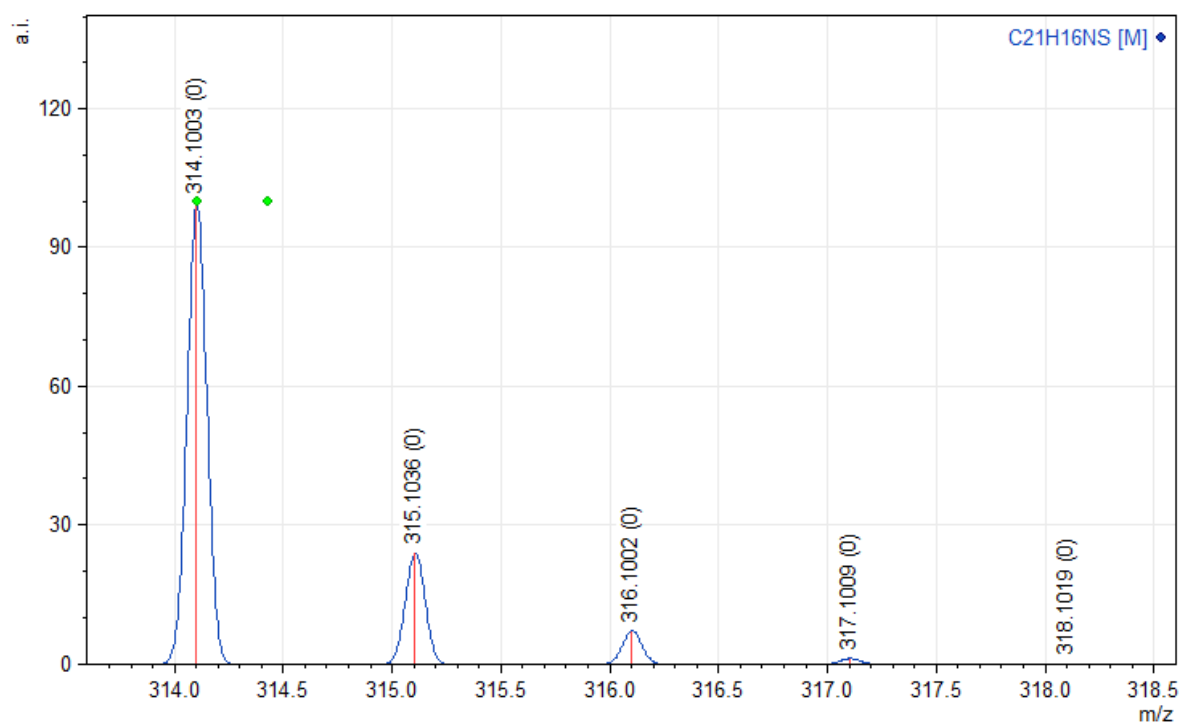

Figure S 5.  $^1\text{H}$  NMR of 2-(anthracenyl)benzothiazolium bisulfate in  $\text{CDCl}_3$

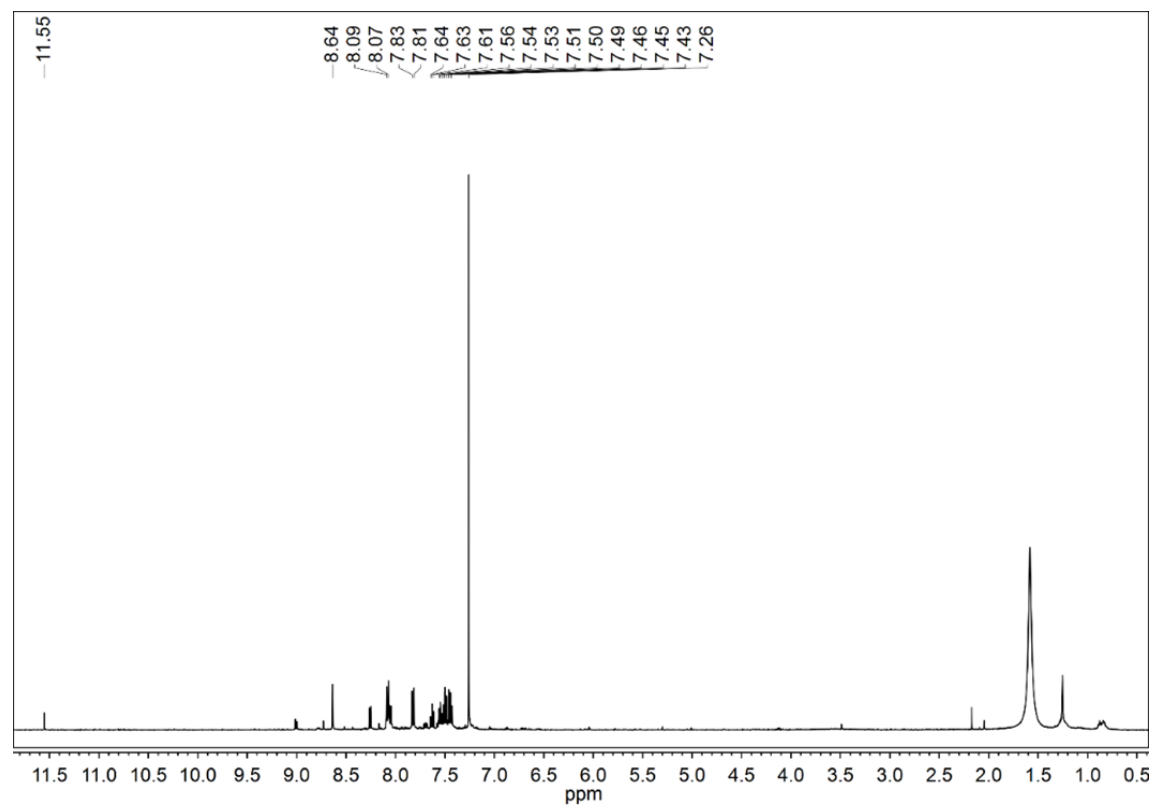

Figure S 6. ESI-MS (in positive mode) after reacting HL with SO<sub>2</sub>

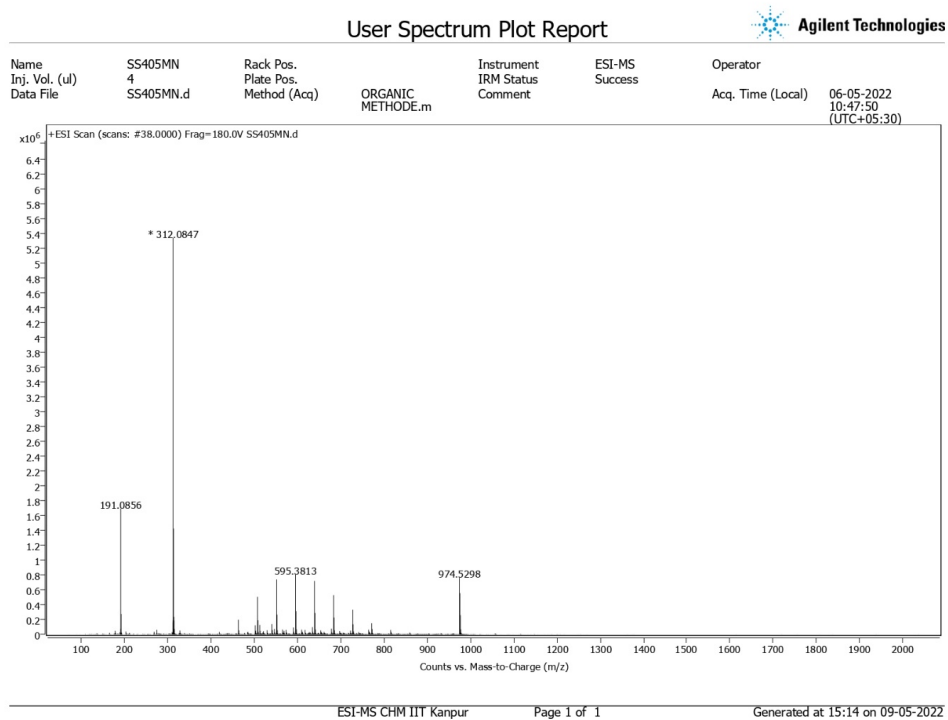

Calculated  $m/z$  for  $[L+H]^+ = [C_{21}H_{14}NS]^+ = 312.0848$ ; observed  $m/z = 312.0847$ .

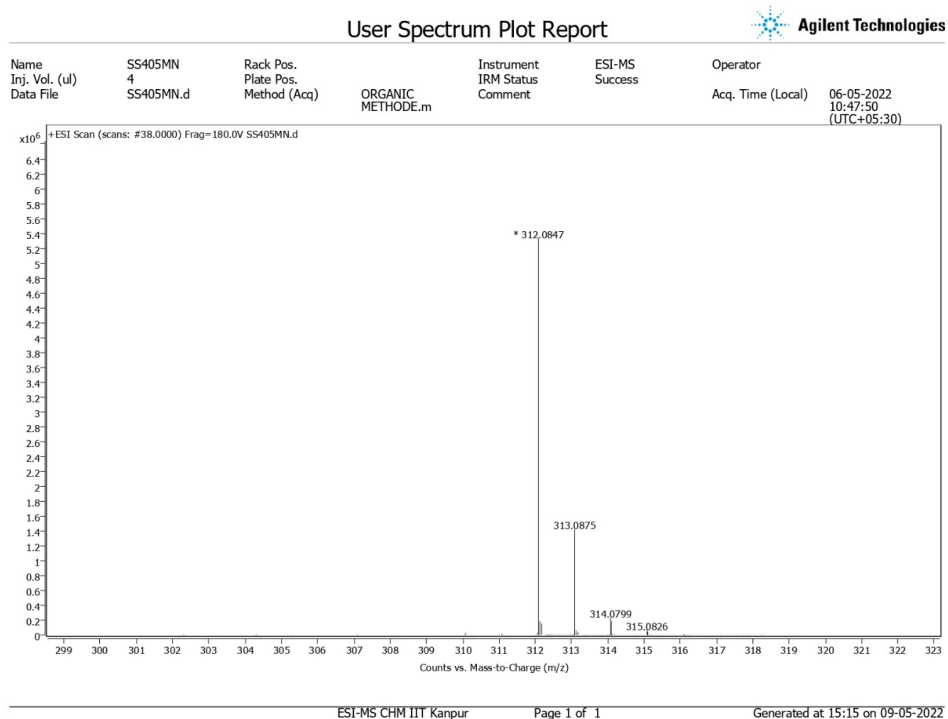

Figure S 7. Simulated for  $[C_{21}H_{14}NS]^+$

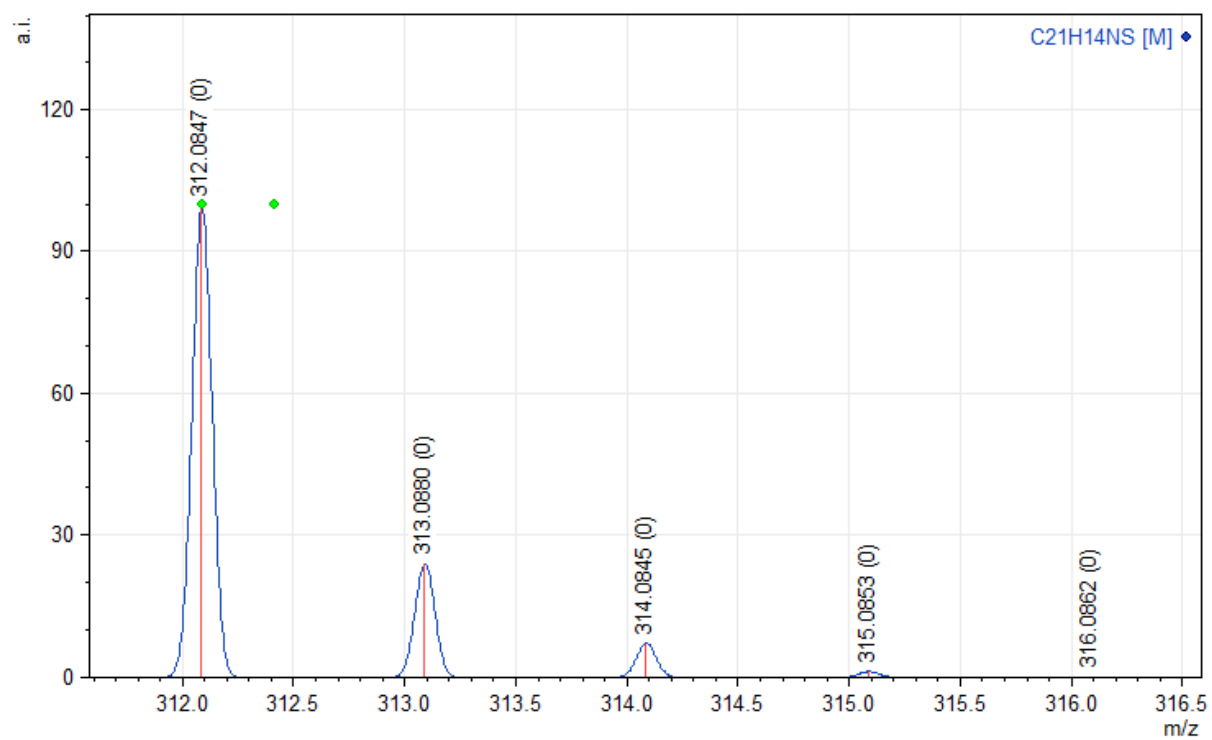

Figure S 8. ESI-MS (in negative mode) after reacting HL with SO<sub>2</sub>

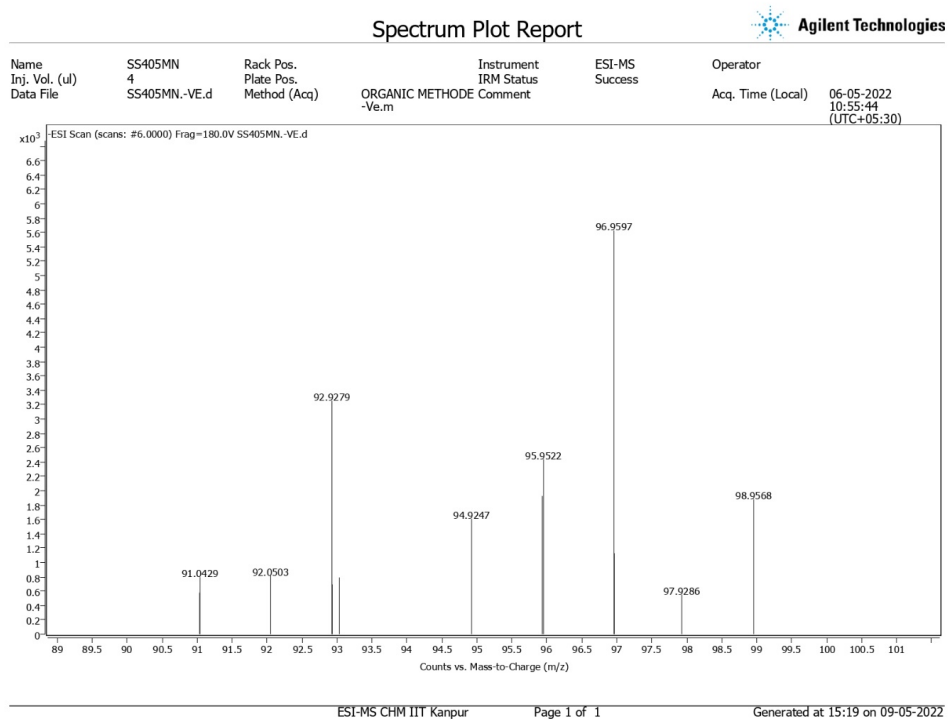

Calculated  $m/z$  for  $[\text{HSO}_4]^- = 96.9596$ ; observed  $m/z = 96.9597$ .

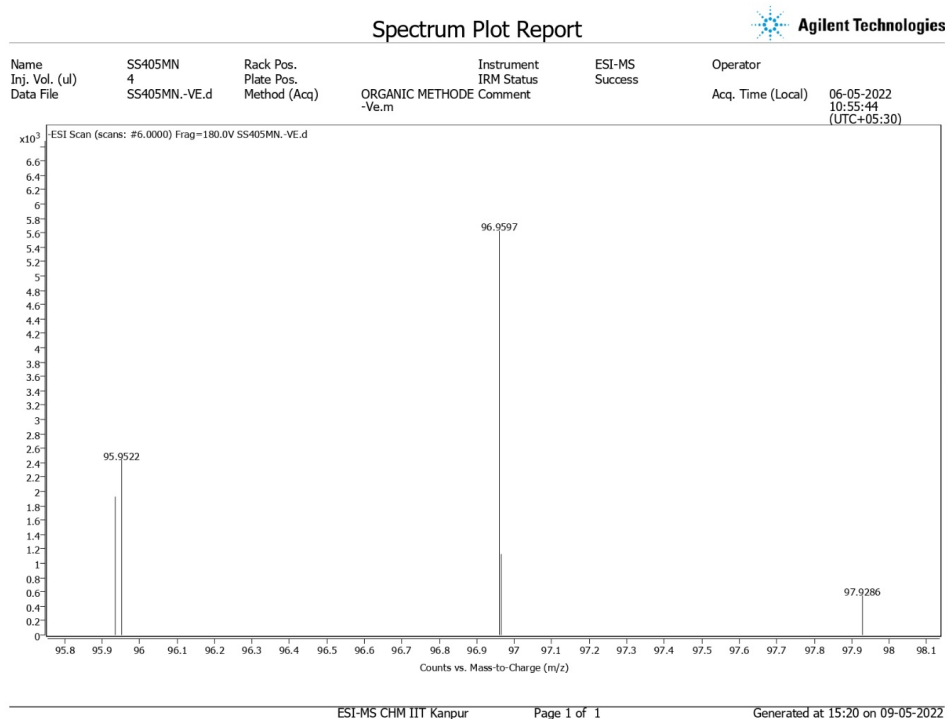

Figure S 9. Simulated for [HSO<sub>4</sub>]

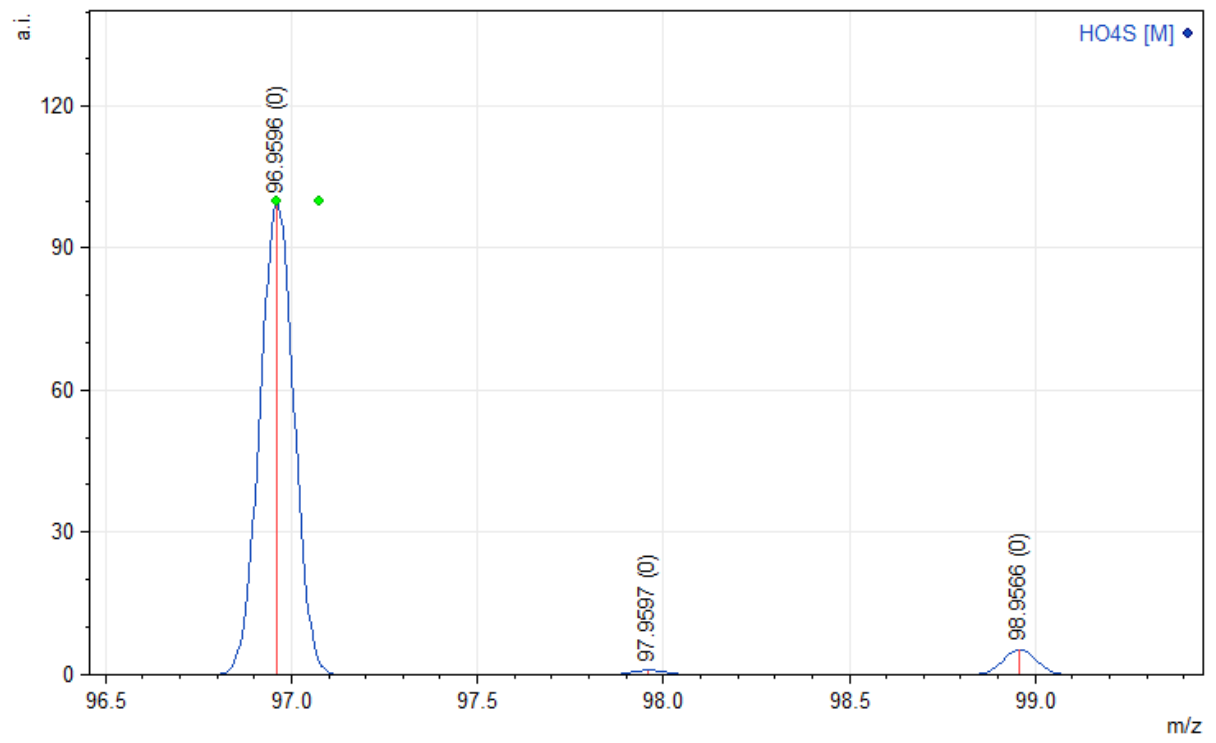

Figure S 10.  $^1\text{H}$ NMR of  $[\text{NiL}_2]$  in  $\text{CDCl}_3$ .

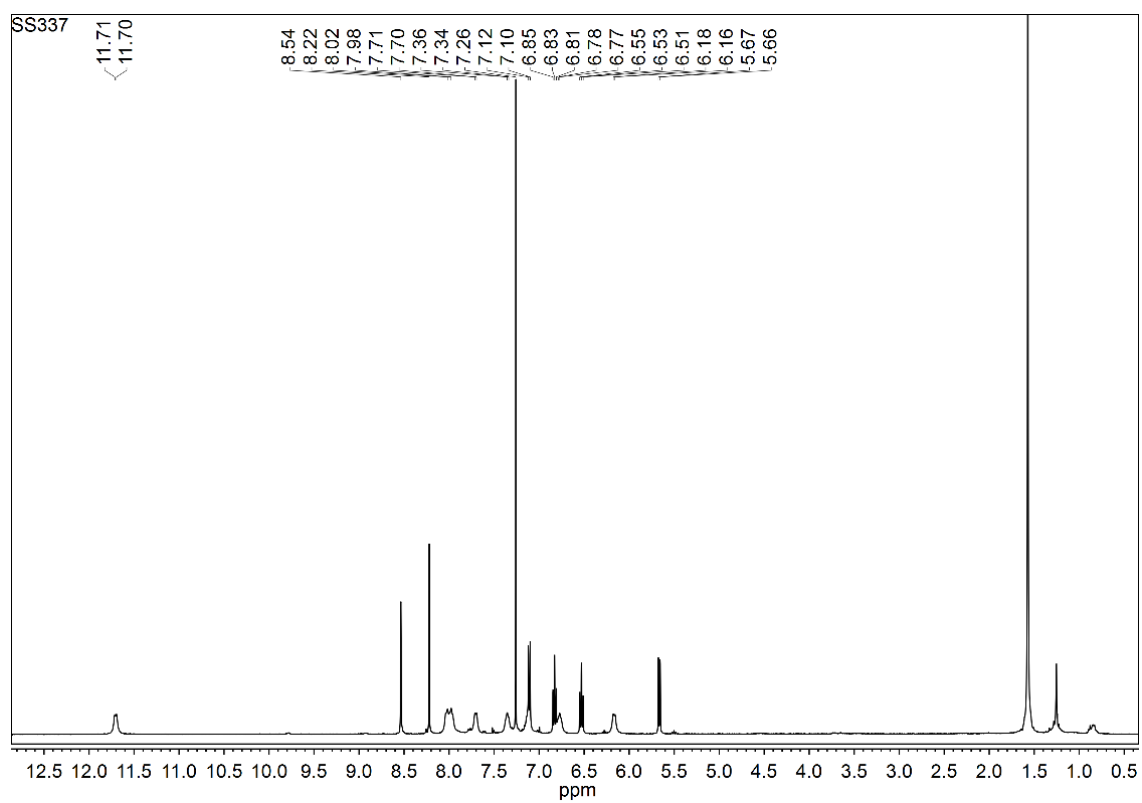



Figure S 11. Stacked  $^1\text{H}$  NMR of  $[\text{NiL}_2]\cdot 2\text{SO}_2$  (top) and  $[\text{NiL}_2]$  (bottom)

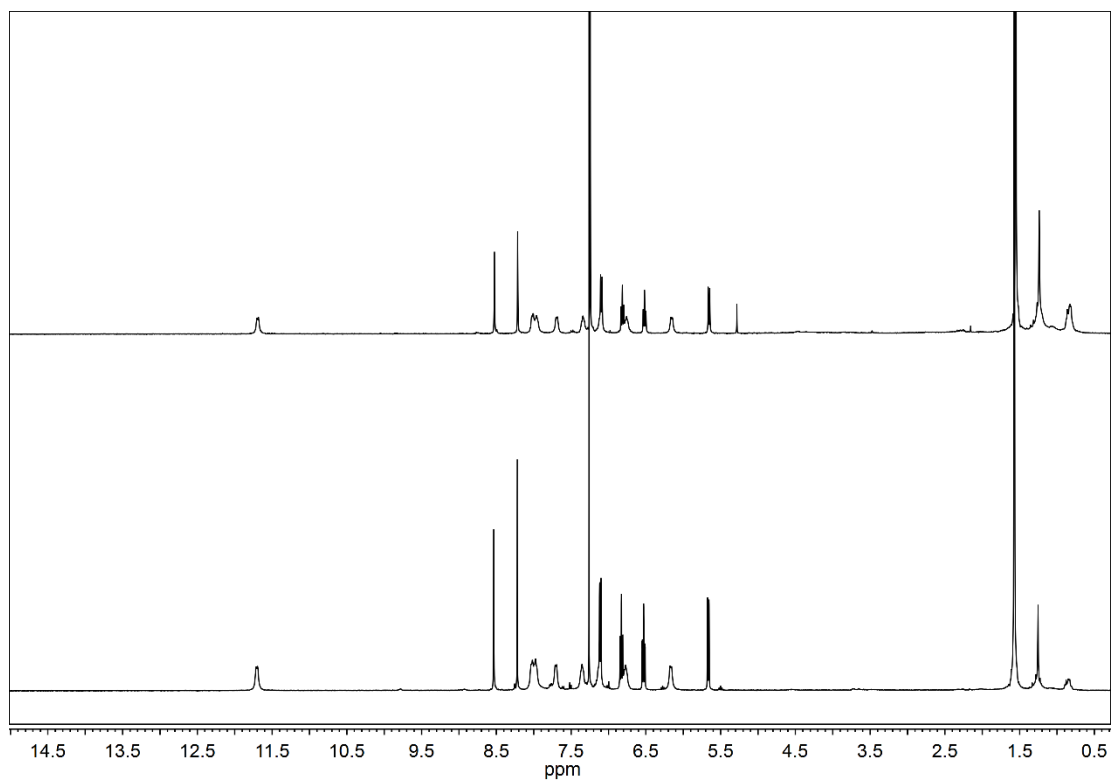

Figure S 12.  $^1\text{H}$ NMR of  $[\text{ZnL}_2]$  in  $\text{CDCl}_3$

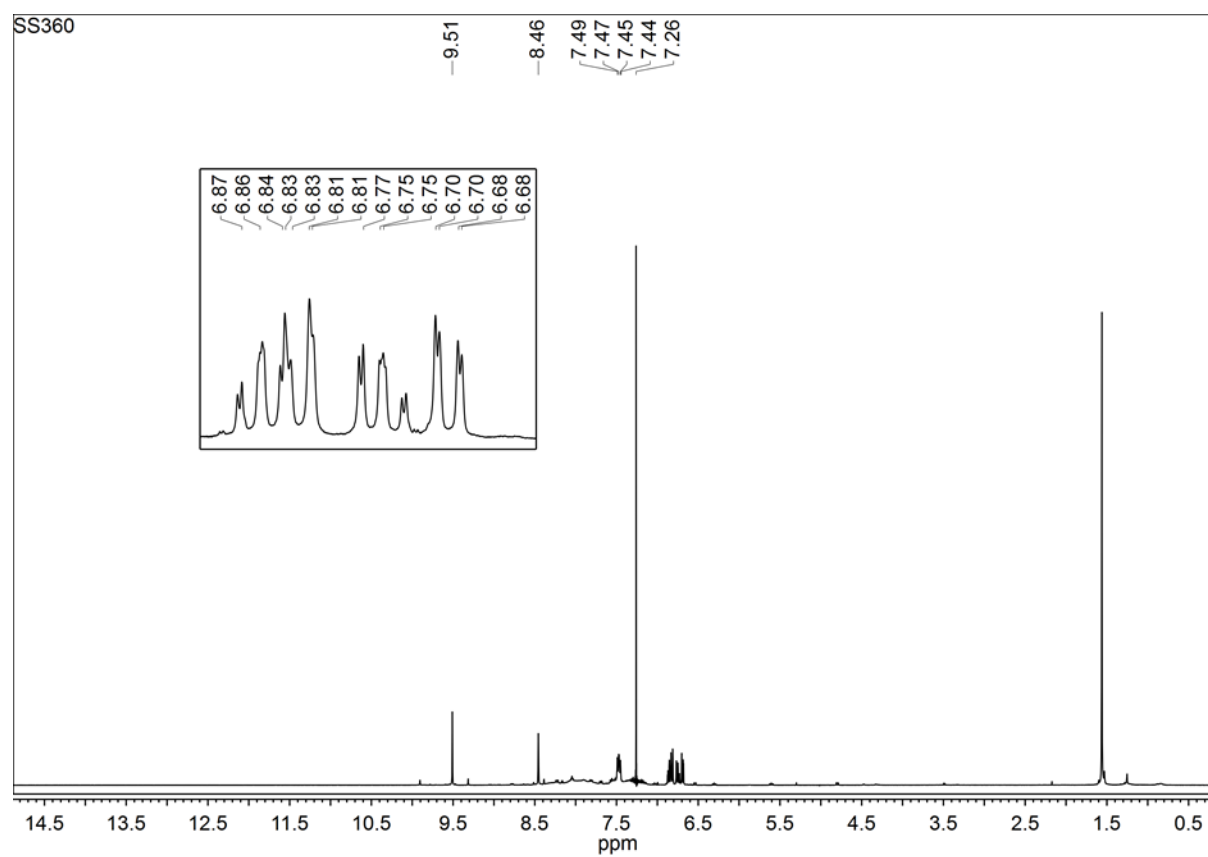

Figure S 13. ESI-MS (in positive mode) after reacting  $[ZnL_2]$  with  $SO_2$

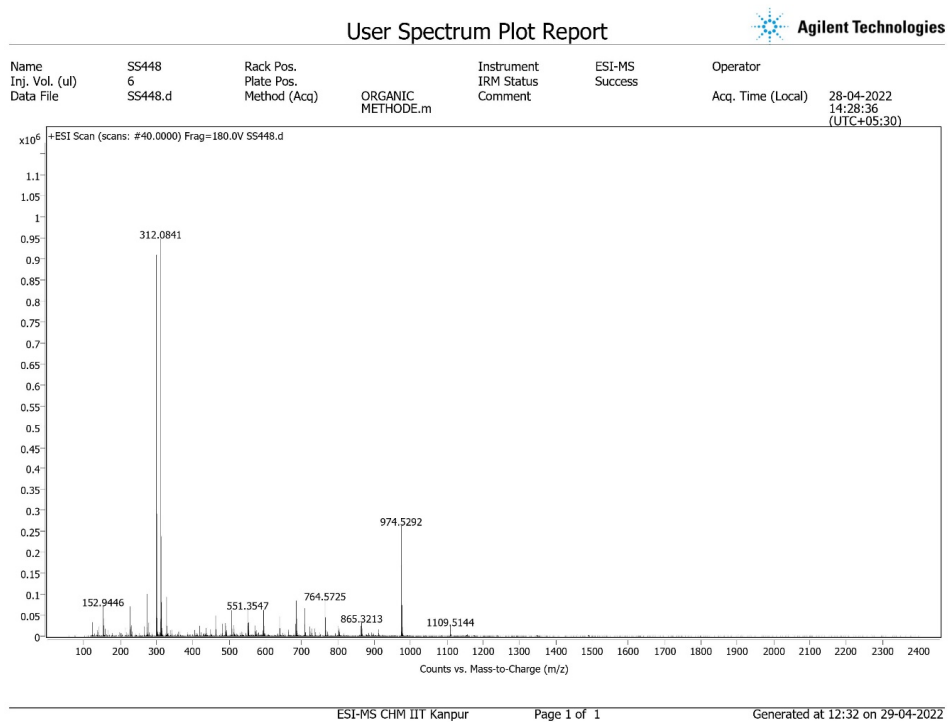

Calculated  $m/z$  for  $[L+H]^+ = [C_{21}H_{14}NS]^+ = 312.0847$ ; observed  $m/z = 312.0841$ .

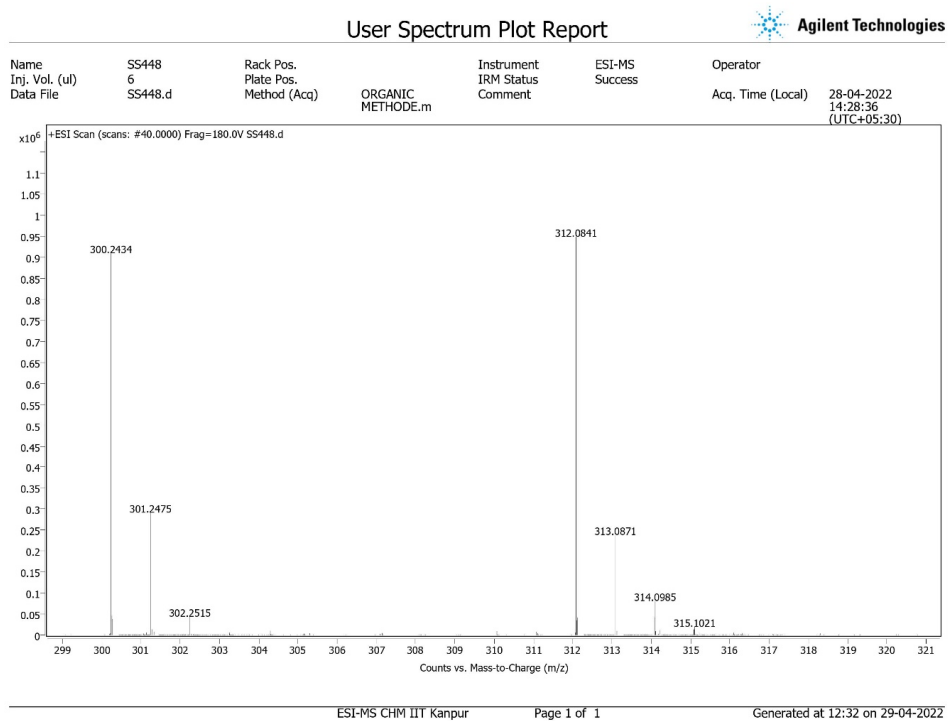

Figure S 14. Simulated for  $[C_{21}H_{14}NS]^+$



Figure S 15. ESI-MS (in negative mode) after reacting  $[ZnL_2]$  with  $SO_2$ .

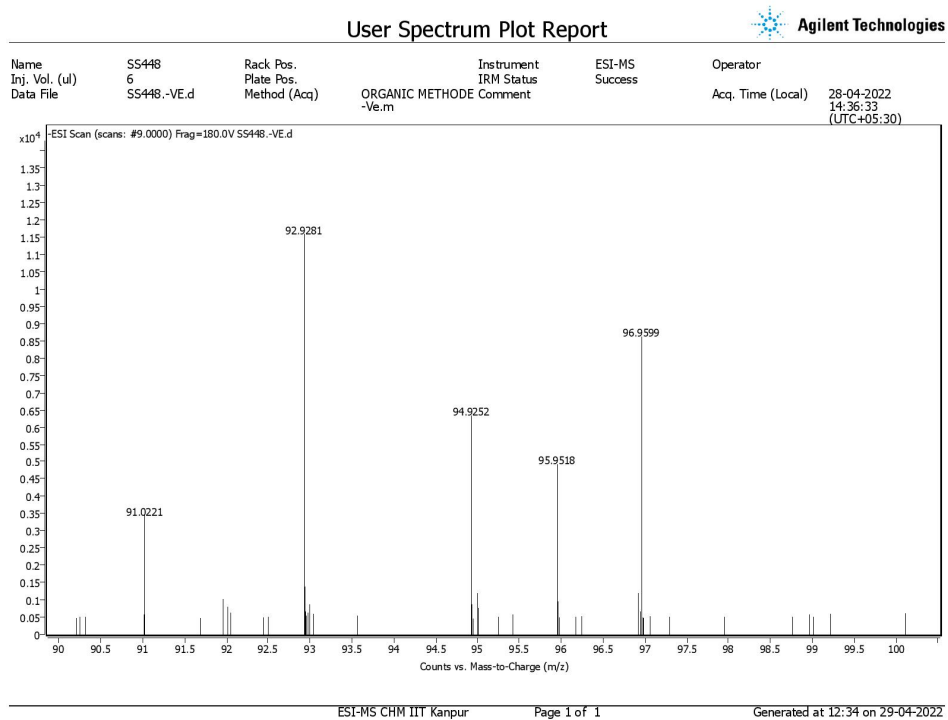

Calculated  $m/z$  for  $[HSO_4]^- = 96.9596$ ; observed  $m/z = 96.9599$ .

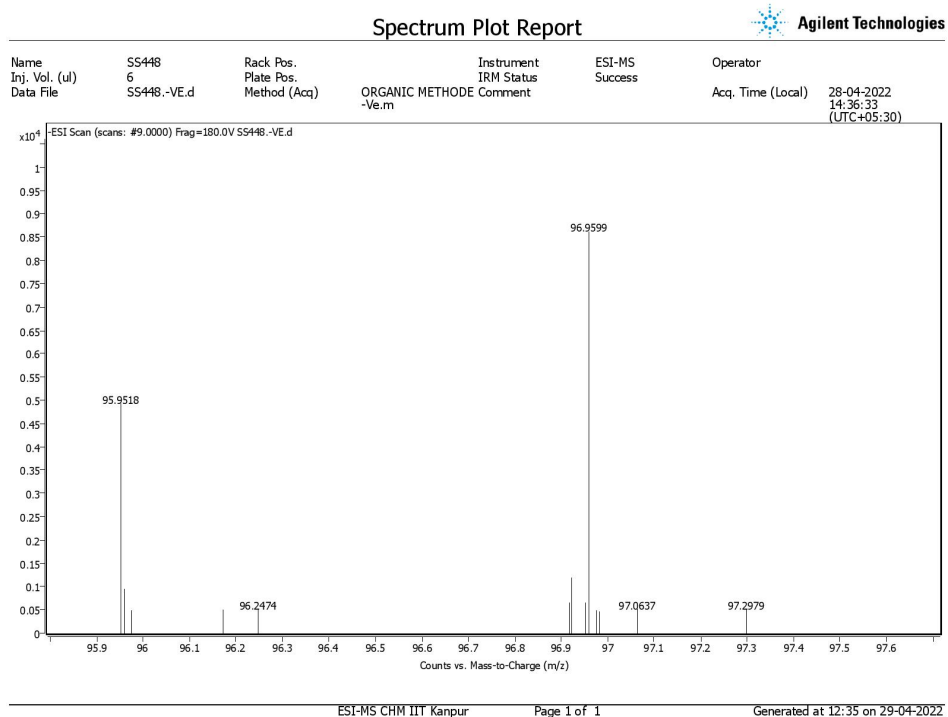

Figure S 16. Simulated for [HSO<sub>4</sub>]

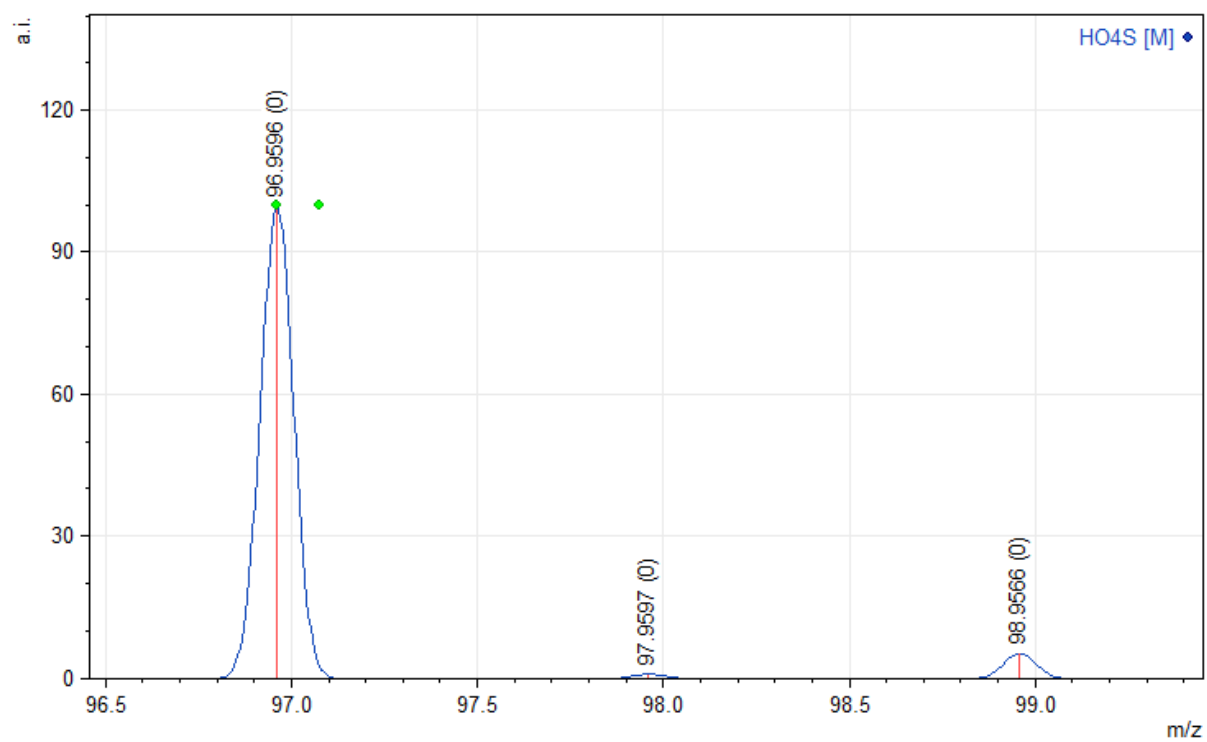

Figure S 17.  $^1\text{H}$ NMR of  $[\text{CdL}_2]$  in  $\text{CDCl}_3$

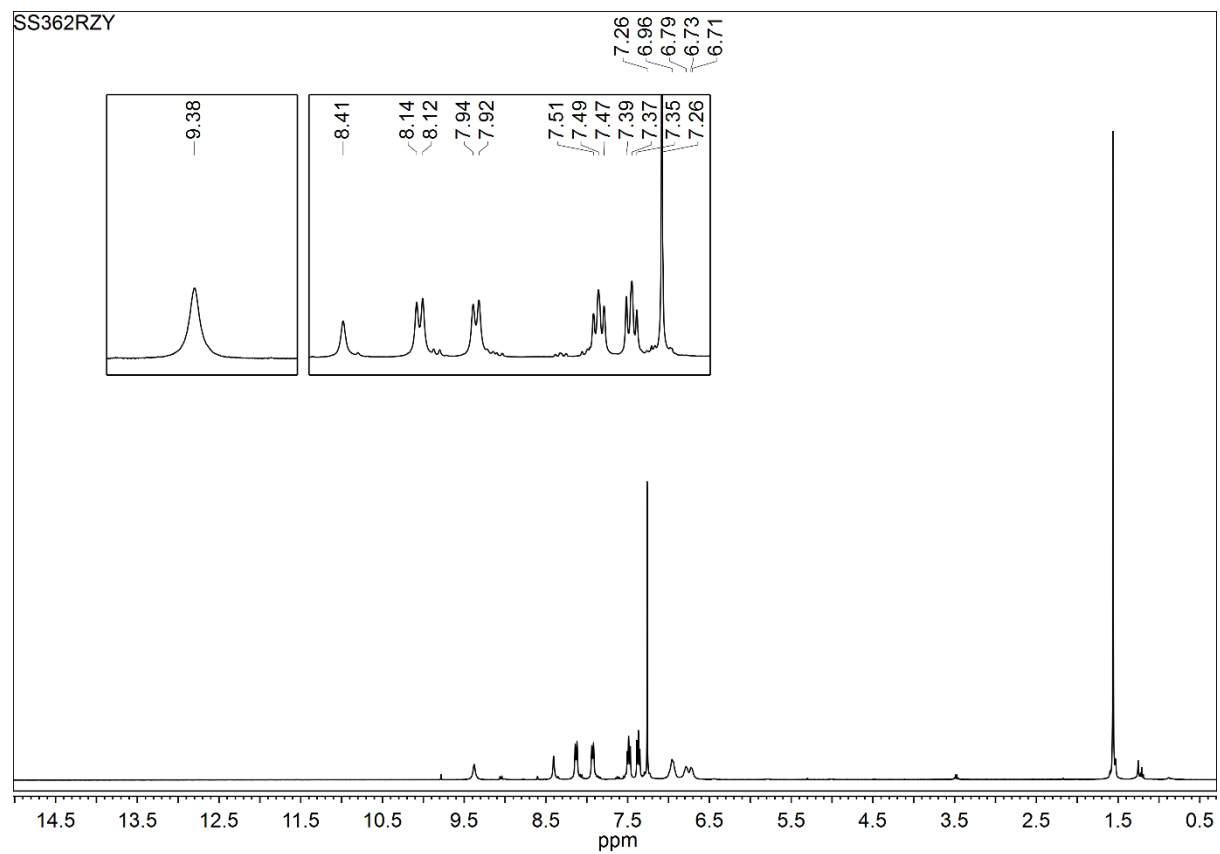

Figure S 18. ESI-MS (in positive mode) after reacting [CdL<sub>2</sub>] with SO<sub>2</sub>.

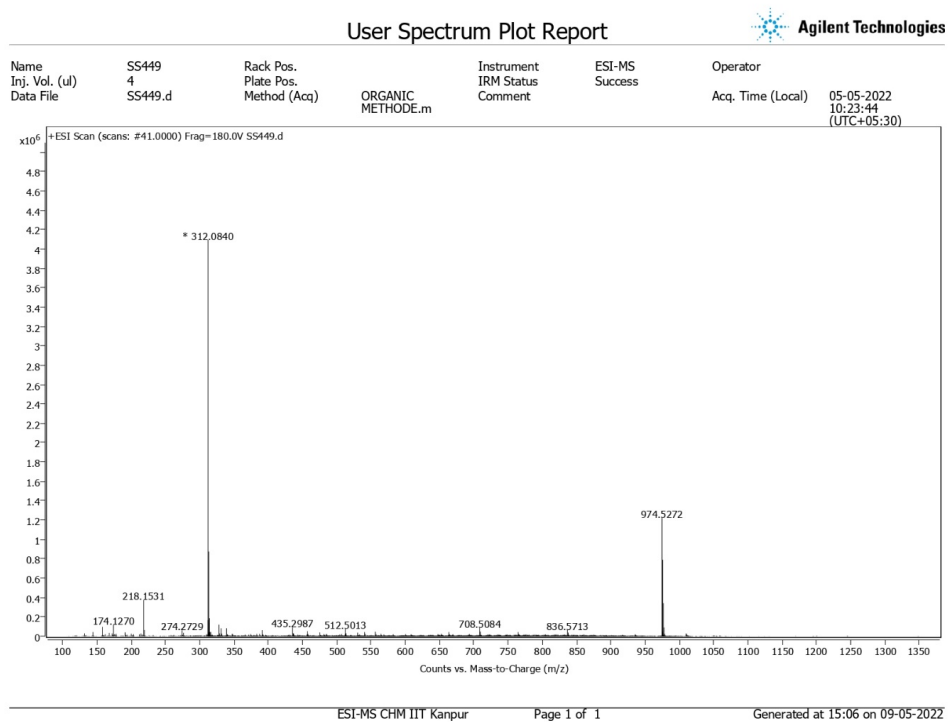

Calculated  $m/z$  for  $[L+H]^+ = [C_{21}H_{14}NS]^+ = 312.0847$ ; observed  $m/z = 312.0840$ .

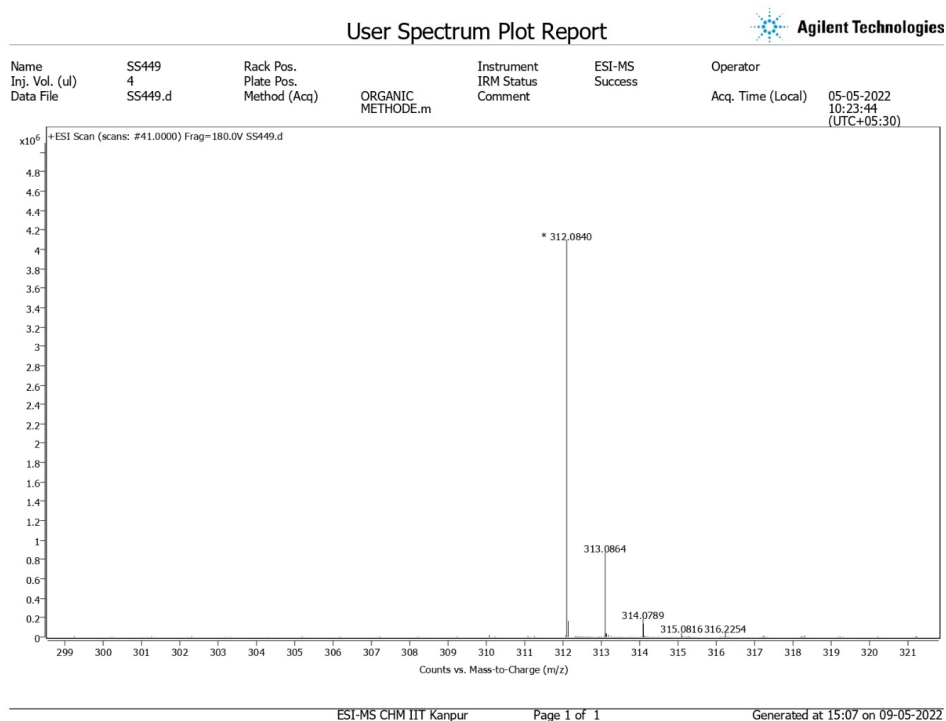



Figure S 19. Simulated for  $[C_{21}H_{14}NS]^+$



Figure S 20. ESI-MS (in negative mode) after reacting  $[\text{CdL}_2]$  with  $\text{SO}_2$ .

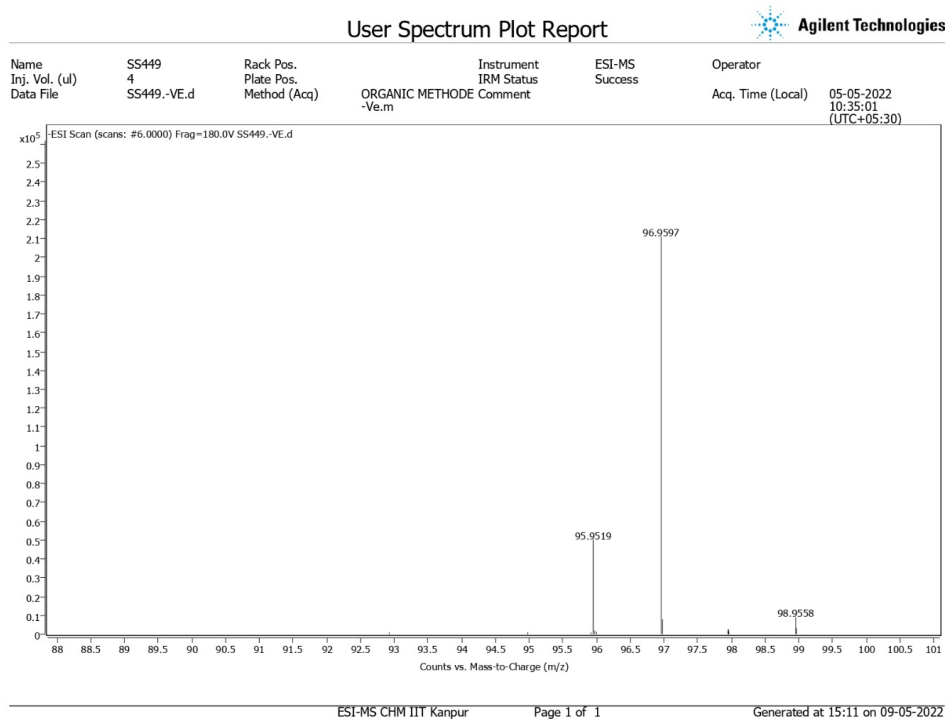

Calculated  $m/z$  for  $[\text{HSO}_4]^- = 96.9596$ ; observed  $m/z = 96.9597$ .

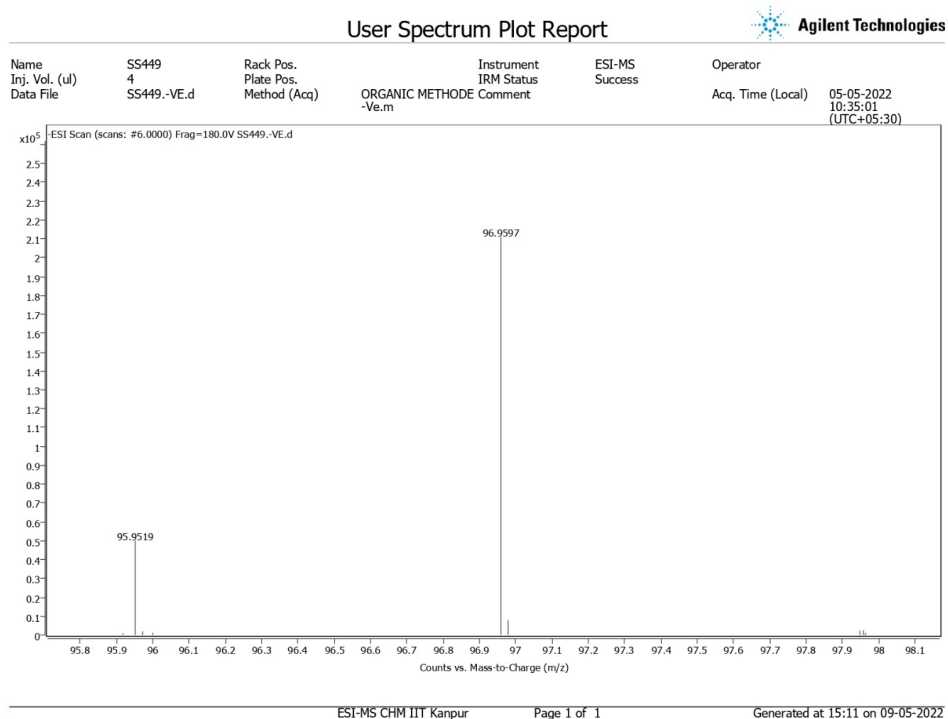

Figure S 21. Simulated for [HSO<sub>4</sub>]

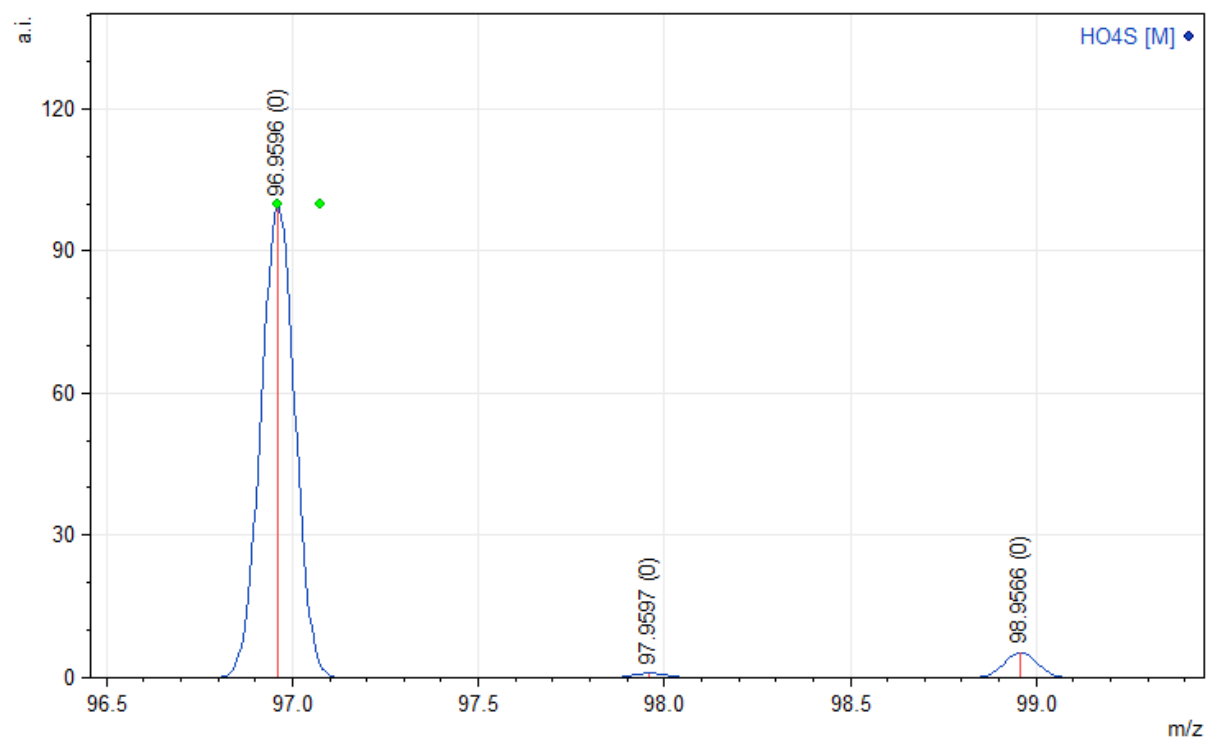

Figure S 22. UV-vis spectrum of 0.01mM [HL] and 0.01mM [LHSO<sub>4</sub>] in DCM at RT

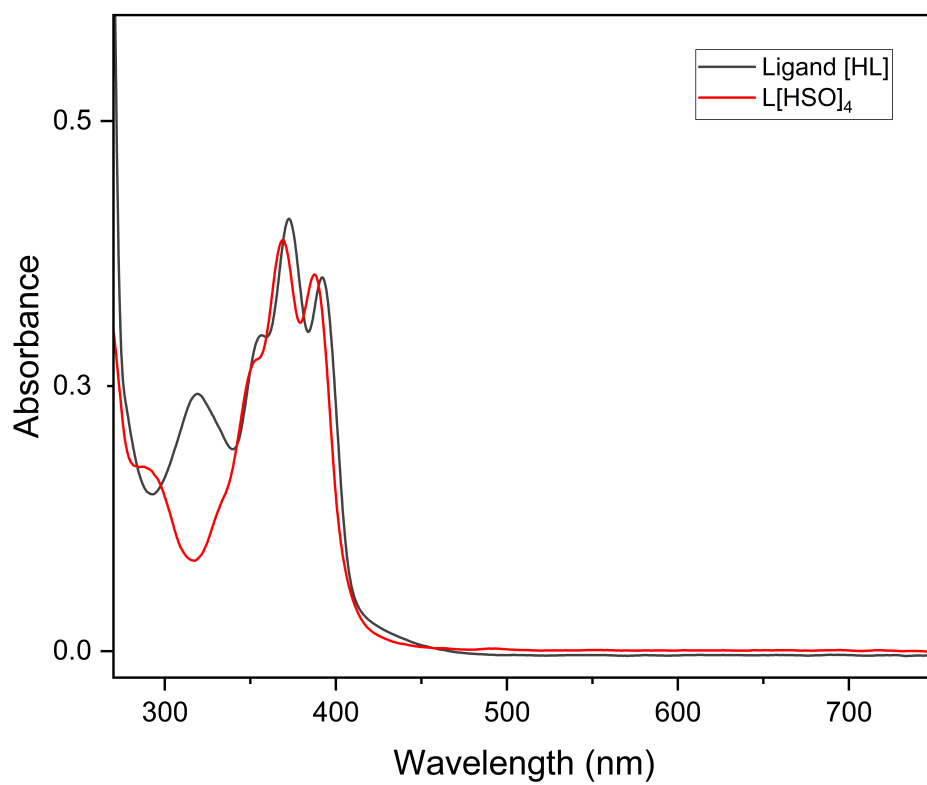

Compounds [HL] (left) and [LHSO<sub>4</sub>] (right)

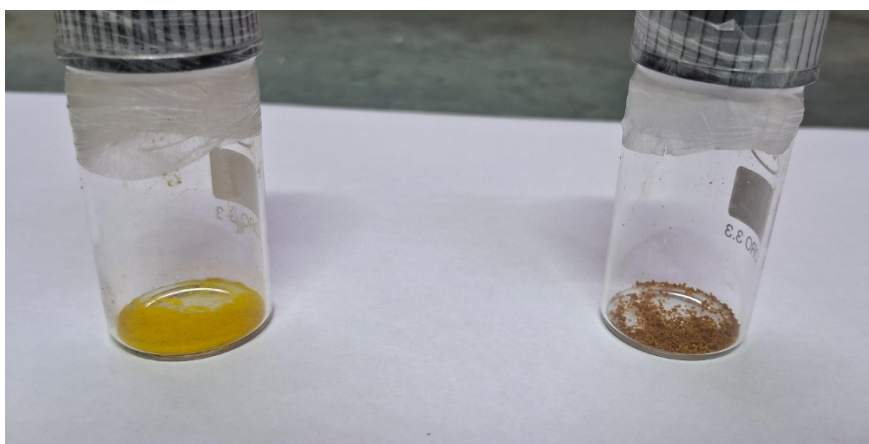

Figure S 23. UV-Vis spectrum of  $[\text{NiL}_2]$  (0.00735 mM in DCM)

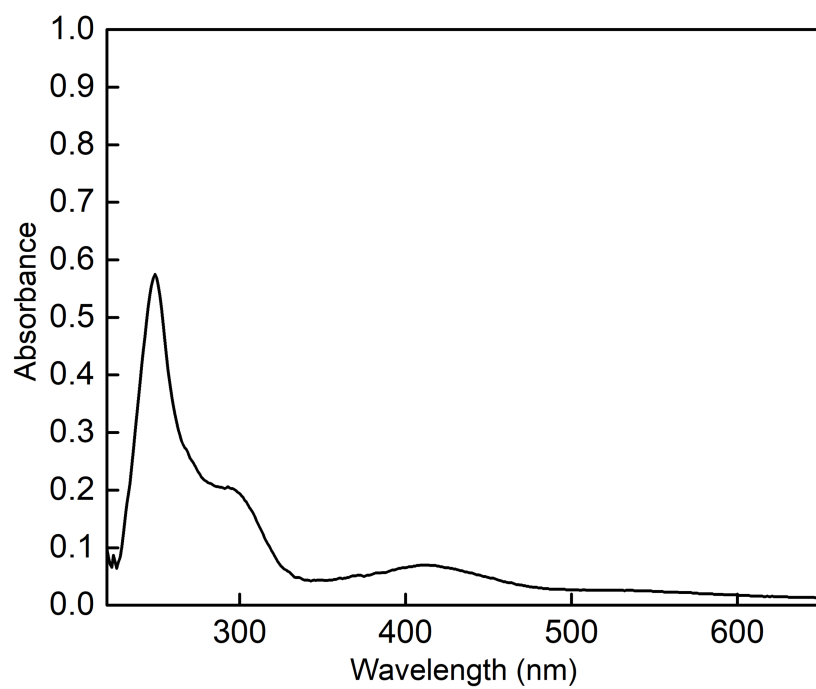

Figure S 24. UV-Vis spectrum of  $[\text{ZnL}_2]$  (0.00735 mM in DCM)

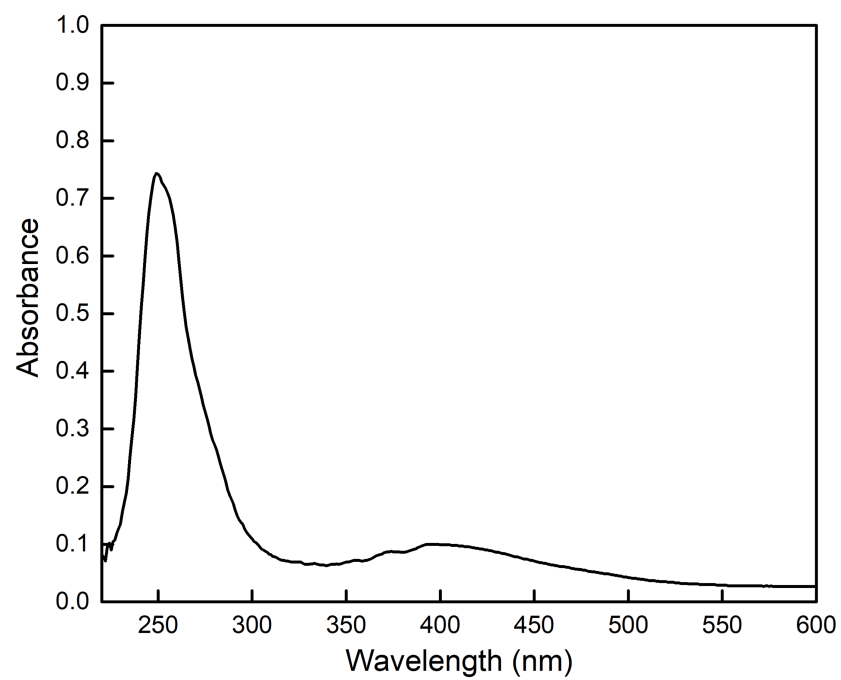

Figure S 25. UV-Vis spectrum of  $[\text{CdL}_2]$  (0.00735 mM in DCM)

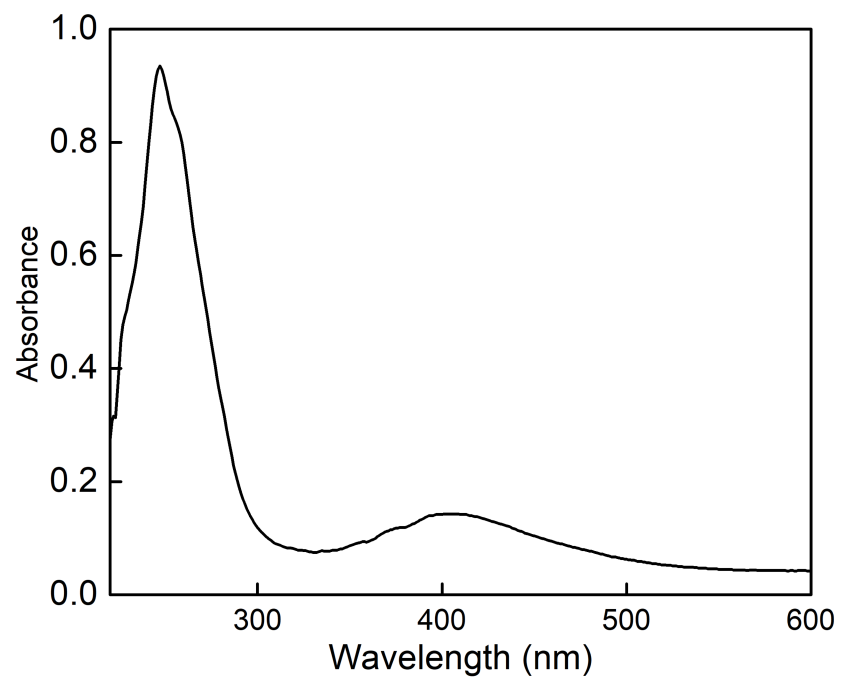

Figure S 26. UV-Vis spectrum of  $[\text{NiL}_2]$ ,  $[\text{CdL}_2]$  and  $[\text{NiL}_2]$ .

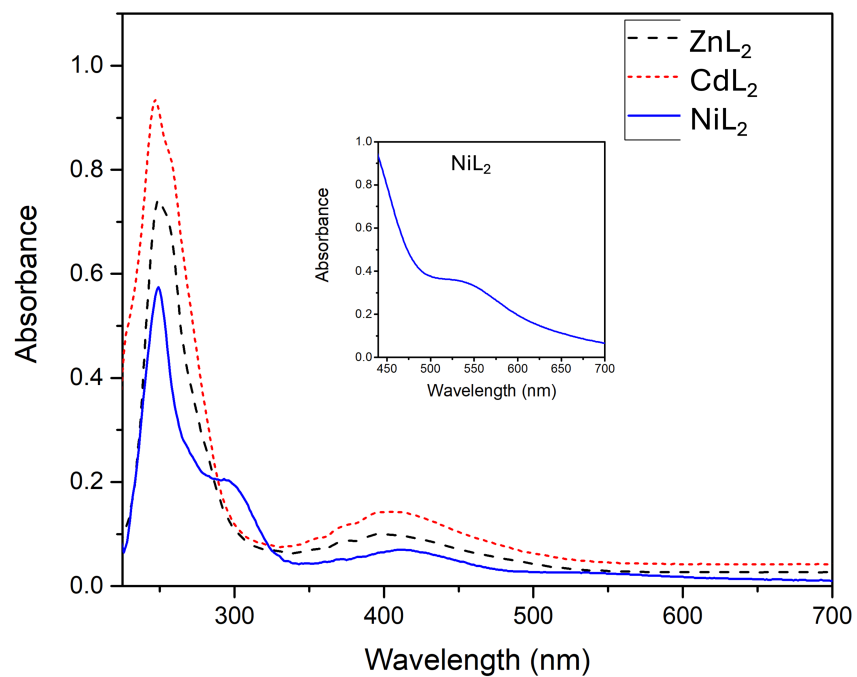

UV-Vis spectrum of  $[\text{NiL}_2]$ ,  $[\text{CdL}_2]$  and  $[\text{NiL}_2]$  (0.00735 mM in DCM) and  $[\text{NiL}_2]$ (0.1 mM) (inset)



Figure S 27. Cyclic Voltammetry (CV) of [NiL<sub>2</sub>].

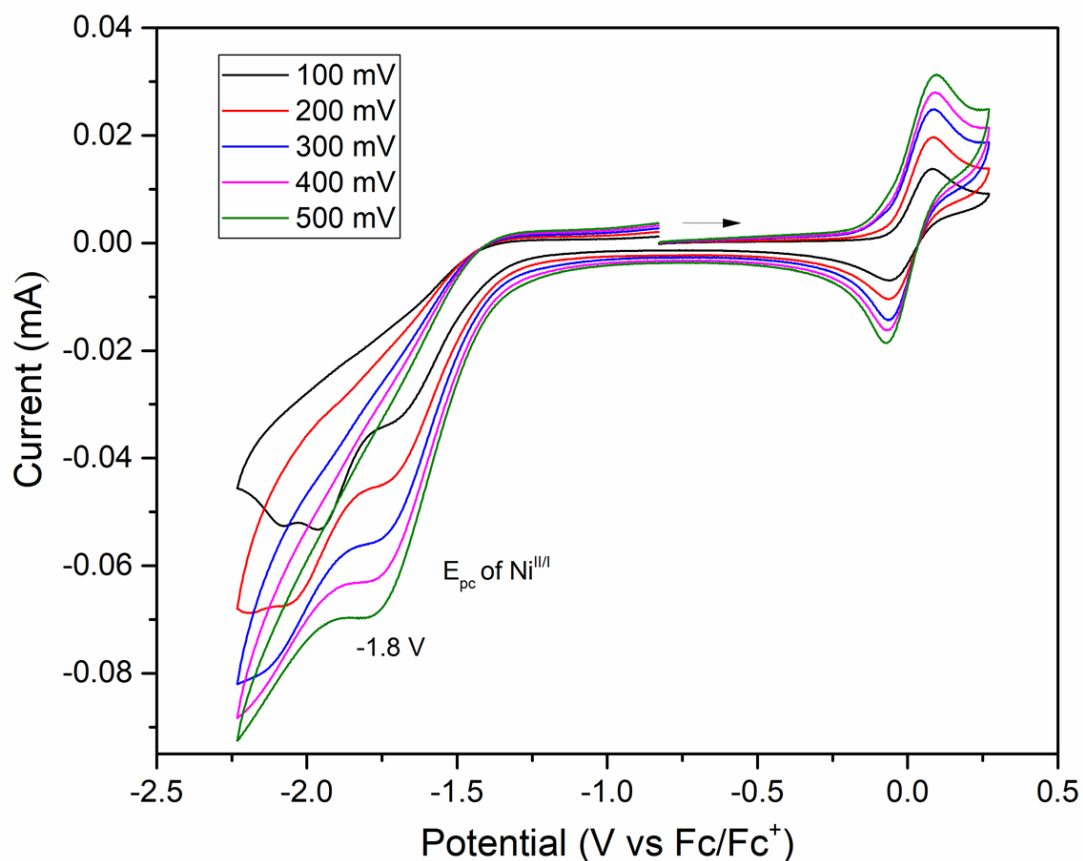

Cyclic voltammogram of the [NiL<sub>2</sub>] in CH<sub>2</sub>Cl<sub>2</sub> at different scan rates. The reversible event centred around 0.0 V is of ferrocene (internal standard). GC working electrode; Pt counter electrode; Ag/AgCl reference electrode was used at 25 °C with the solution concentration of 1 mM and 0.1 M NBu<sub>4</sub>PF<sub>6</sub>.

Figure S 28. Thermogravimetric analysis of  $[\text{NiL}_2]\cdot 2\text{SO}_2$

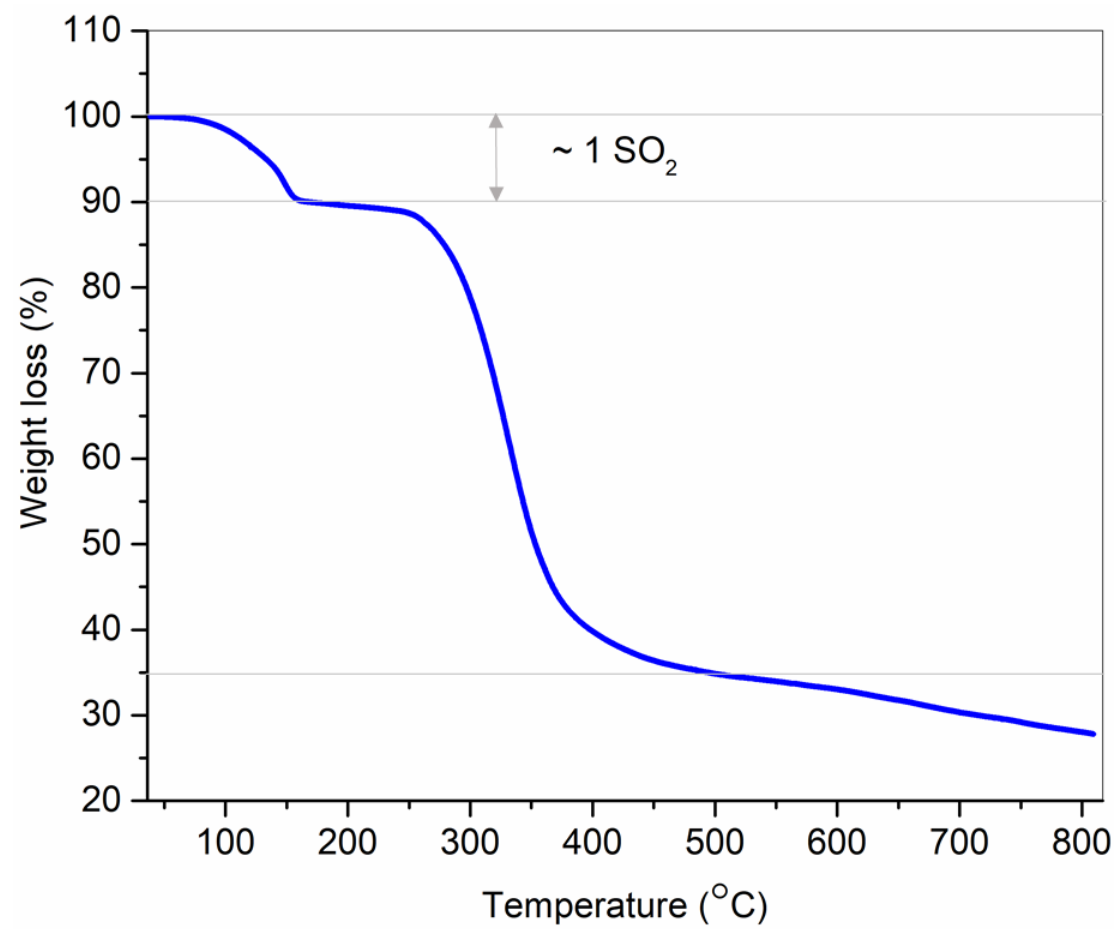

Figure S 29. FT-IR for  $[\text{NiL}_2]$  and  $[\text{NiL}_2] \cdot 2\text{SO}_2$

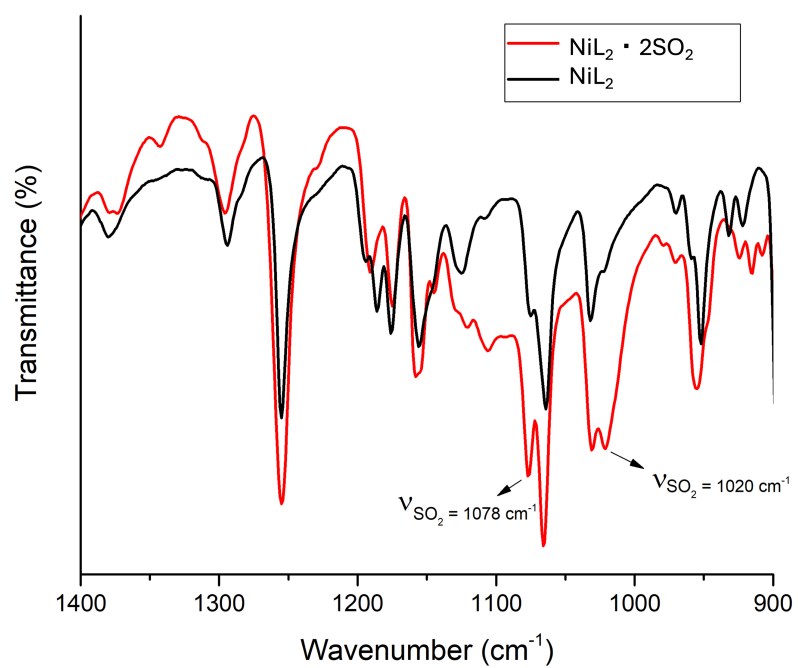

Figure S 30. ORTEP of  $[\text{NiL}_2]$  drawn at 50% probability

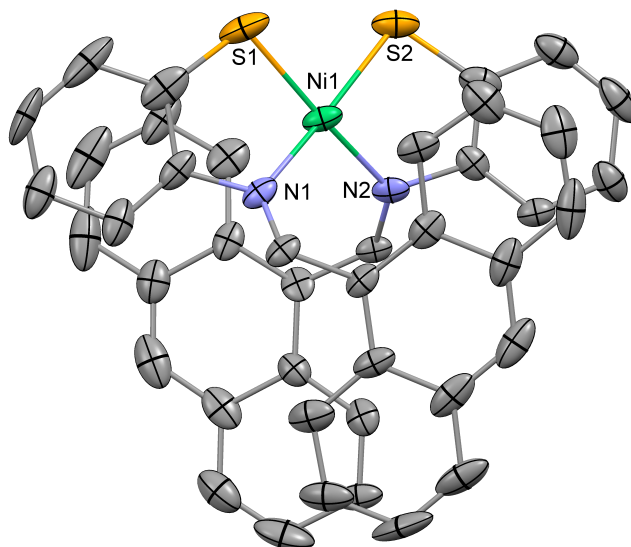

Hydrogen atoms and solvent molecules are omitted for clarity. Selected distances [ $\text{\AA}$ ] and angles [ $^\circ$ ]: Ni(1)-S(1), 2.187(2); Ni(1)-S(2), 2.186(2); Ni(1)-N(2), 1.930(5); Ni(1)-N(1), 1.914(6); S(2)-Ni(1)-S(1), 87.19(8); N(2)-Ni(1)-S(1), 171.70(16); N(2)-Ni(1)-S(2), 86.54(17); N(1)-Ni(1)-S(1), 87.24(17); N(1)-Ni(1)-S(2), 170.51(17); N(1)-Ni(1)-N(2), 99.9(2).

Figure S 31. ORTEP of [ZnL<sub>2</sub>] drawn at 50% probability

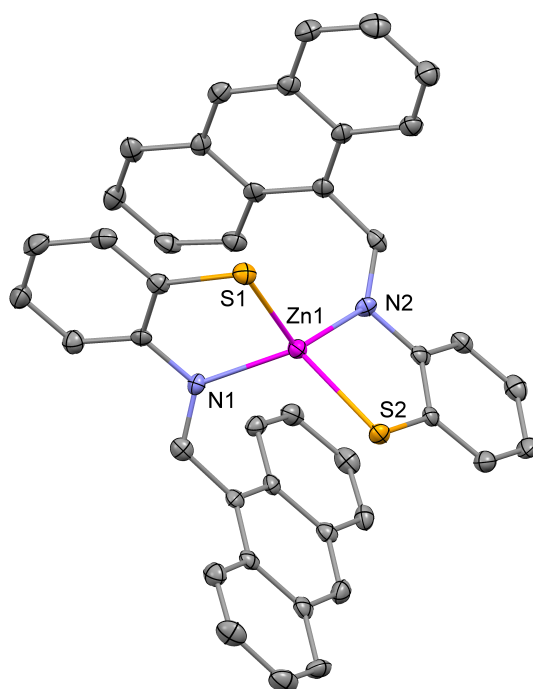

Hydrogen atoms and solvent molecules are omitted for clarity. Selected distances [ $\text{\AA}$ ] and angles [ $^\circ$ ]: Zn(1)-S(1), 2.2764(11); Zn(1)-S(2), 2.2751(10); Zn(1)-N(2), 2.080(3); Zn(1)-N(1), 2.087(3); S(2)-Zn(1)-S(1), 129.04(4); N(2)-Zn(1)-S(2), 88.01(9); N(2)-Zn(1)-S(1), 118.32(9); N(1)-Zn(1)-S(2), 116.19(9); N(1)-Zn(1)-S(1), 87.34(9); N(1)-Zn(1)-N(2), 121.93(12).

Figure S 32. ORTEP of  $[\text{CdL}_2]$  drawn at 50% probability

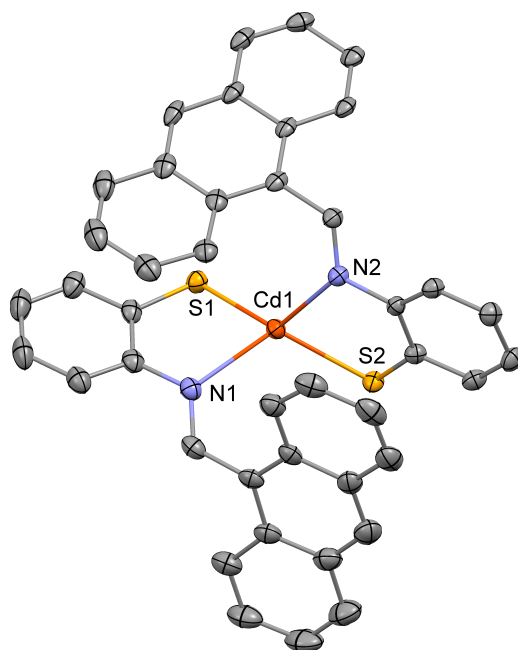

Hydrogen atoms and solvent molecules are omitted for clarity. Selected distances [ $\text{\AA}$ ] and angles [ $^\circ$ ]: Cd(1)-S(1), 2.4432(7); Cd(1)-S(2), 2.4403(7); Cd(1)-N(2), 2.306(2); Cd(1)-N(1), 2.336(2); S(2)-Cd(1)-S(1), 132.66(2); N(2)-Cd(1)-S(2), 81.77(5); N(2)-Cd(1)-S(1), 125.17(5); N(1)-Cd(1)-S(2), 118.32(6); N(1)-Cd(1)-S(1), 81.08(6); N(2)-Cd(1)-N(1), 123.66(7).

Figure S 33. ORTEP of  $[\text{NiL}_2]\cdot 2\text{SO}_2$  drawn at 50% probability

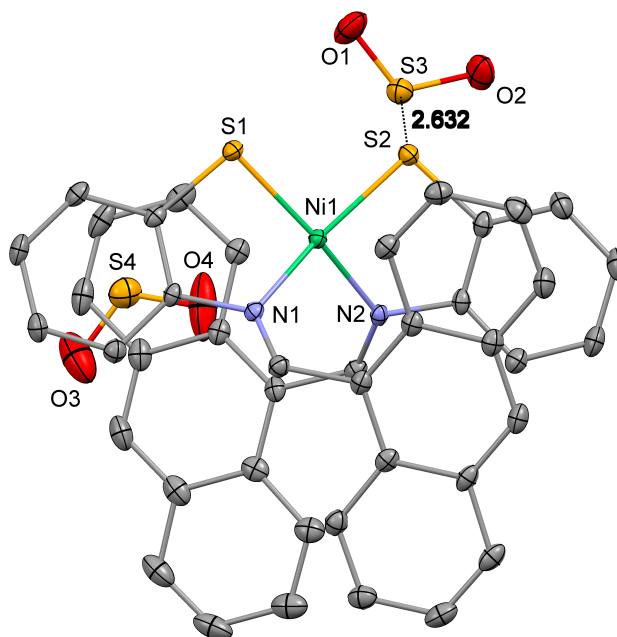

Hydrogen atoms and solvent molecules are omitted for clarity. Selected distances [ $\text{\AA}$ ] and angles [ $^\circ$ ]: Ni(1)-S(1), 2.1791(5); Ni(1)-S(2), 2.1840(6); Ni(1)-N(2), 1.9231(16); Ni(1)-N(1), 1.9037(16); S(3)-O(2), 1.4371(18); S(3)-O(1), 1.4358(18); S(4)-O(4), 1.396(2); S(4)-O(3), 1.408(2) S(1)-Ni(1)-S(2), 94.05(2); N(1)-Ni(1)-S(1), 87.28(5); N(1)-Ni(1)-S(2), 162.03(6); N(1)-Ni(1)-N(2), 95.90(7); N(2)-Ni(1)-S(1), 164.93(5); N(2)-Ni(1)-S(2), 87.46(5); O(1)-S(3)-O(2), 115.86(12); O(4)-S(4)-O(3), 117.23(17).

Table S 1. Crystallographic data for  $[\text{NiL}_2]\cdot 2\text{CHCl}_3$ 

|                                   |                                                                                  |                           |
|-----------------------------------|----------------------------------------------------------------------------------|---------------------------|
| Identification code               | 22octa                                                                           | 2348655                   |
| Empirical formula                 | C <sub>44</sub> H <sub>30</sub> Cl <sub>6</sub> N <sub>2</sub> Ni S <sub>2</sub> |                           |
| Molecular weight                  | 922.21                                                                           |                           |
| Temperature                       | 100 K                                                                            |                           |
| Wavelength                        | 0.71073 Å                                                                        |                           |
| Crystal system                    | monoclinic                                                                       |                           |
| Space group                       | Cc                                                                               |                           |
| Unit cell dimensions              | a = 22.540(3) Å                                                                  | $\alpha = 90^\circ$       |
|                                   | b = 7.2448(8) Å                                                                  | $\beta = 95.286(5)^\circ$ |
|                                   | c = 24.023(3) Å                                                                  | $\gamma = 90^\circ$       |
| Volume                            | 3906.3(8) Å <sup>3</sup>                                                         |                           |
| Z                                 | 2                                                                                |                           |
| Density (calculated)              | 1.162 mg/m <sup>3</sup>                                                          |                           |
| Absorption coefficient            | 0.632 mm <sup>-1</sup>                                                           |                           |
| F(000)                            | 1416.0                                                                           |                           |
| Crystal size                      | 0.26 x 0.24 x 0.22 mm <sup>3</sup>                                               |                           |
| Theta range for data collection   | 5.91 to 50.098°                                                                  |                           |
| Index ranges                      | -26 ≤ h ≤ 26, -8 ≤ k ≤ 8, -28 ≤ l ≤ 28                                           |                           |
| Reflections collected             | 21812                                                                            |                           |
| Independent reflections           | 6914 [R <sub>int</sub> = 0.0516, R <sub>sigma</sub> = 0.0664]                    |                           |
| Completeness to theta = 25.049°   | 100%                                                                             |                           |
| Absorption correction             | Semi-empirical from equivalents                                                  |                           |
| Max. and min transmission         | 0.746 and 0.674                                                                  |                           |
| Refinement method                 | Full-matrix least-squares on F <sup>2</sup>                                      |                           |
| Data/restraints/parameters        | 6916/2/424                                                                       |                           |
| Goodness-of-fit on F <sup>2</sup> | 1.027                                                                            |                           |
| Final R indices [I > 2 sigma(I)]  | R1 = 0.0478, wR2 = 0.1123                                                        |                           |
| R indices (all data)              | R1 = 0.0611, wR2 = 0.1198                                                        |                           |
| Largest diff. peak and hole       | 0.32 and -0.27 e.Å <sup>-3</sup>                                                 |                           |
| Flack parameter                   | 0.11(2)                                                                          |                           |



Table S 2. Crystallographic data for [ZnL<sub>2</sub>] $\cdot$ 2CHCl<sub>3</sub>

|                                   |                                                                                  |                           |
|-----------------------------------|----------------------------------------------------------------------------------|---------------------------|
| Identification code               | 17decd_0m_a                                                                      | 2348657                   |
| Empirical formula                 | C <sub>44</sub> H <sub>30</sub> Cl <sub>6</sub> N <sub>2</sub> S <sub>2</sub> Zn |                           |
| Molecular weight                  | 928.89                                                                           |                           |
| Temperature                       | 100 K                                                                            |                           |
| Wavelength                        | 0.71073 Å                                                                        |                           |
| Crystal system                    | monoclinic                                                                       |                           |
| Space group                       | P2 <sub>1</sub> /n                                                               |                           |
| Unit cell dimensions              | a = 11.5194(8) Å                                                                 | $\alpha = 90^\circ$       |
|                                   | b = 14.7126(9) Å                                                                 | $\beta = 96.677(2)^\circ$ |
|                                   | c = 24.0486(15) Å                                                                | $\gamma = 90^\circ$       |
| Volume                            | 4048.1(5) Å <sup>3</sup>                                                         |                           |
| Z                                 | 4                                                                                |                           |
| Density (calculated)              | 1.524 mg/m <sup>3</sup>                                                          |                           |
| Absorption coefficient            | 1.142 mm <sup>-1</sup>                                                           |                           |
| F(000)                            | 1888.0                                                                           |                           |
| Crystal size                      | 0.29 x 0.23 x 0.13 mm <sup>3</sup>                                               |                           |
| Theta range for data collection   | 4.392 to 50.1°                                                                   |                           |
| Index ranges                      | -13 ≤ h ≤ 13, -17 ≤ k ≤ 17, -28 ≤ l ≤ 28                                         |                           |
| Reflections collected             | 19051                                                                            |                           |
| Independent reflections           | 9921 [R <sub>int</sub> = 0.0868, R <sub>sigma</sub> = 0.1112]                    |                           |
| Completeness to theta = 28.321°   | 98.4%                                                                            |                           |
| Absorption correction             | Semi-empirical from equivalents                                                  |                           |
| Max. and min transmission         | 0.746 and 0.674                                                                  |                           |
| Refinement method                 | Full-matrix least-squares on F <sup>2</sup>                                      |                           |
| Data/restraints/parameters        | 9921/0/496                                                                       |                           |
| Goodness-of-fit on F <sup>2</sup> | 1.041                                                                            |                           |
| Final R indices [I > 2 sigma(I)]  | R1 = 0.0634, wR2 = 0.1249                                                        |                           |
| R indices (all data)              | R1 = 0.1136 R2 = 0.1432                                                          |                           |
| Largest diff. peak and hole       | 0.70 and -0.91 e.Å <sup>-3</sup>                                                 |                           |

Table S 3. Crystallographic data for [CdL<sub>2</sub>]<sub>3</sub>·2(C<sub>2</sub>H<sub>5</sub>)<sub>2</sub>O

|                                   |                                                                                                |                |
|-----------------------------------|------------------------------------------------------------------------------------------------|----------------|
| Identification code               | 24decd_a                                                                                       | 2348658        |
| Empirical formula                 | C <sub>134</sub> H <sub>104</sub> Cd <sub>3</sub> N <sub>6</sub> O <sub>2</sub> S <sub>6</sub> |                |
| Molecular weight                  | 2359.79                                                                                        |                |
| Temperature                       | 100 K                                                                                          |                |
| Wavelength                        | 0.71073 Å                                                                                      |                |
| Crystal system                    | monoclinic                                                                                     |                |
| Space group                       | C2/c                                                                                           |                |
| Unit cell dimensions              | a = 31.979(3) Å                                                                                | α = 90°        |
|                                   | b = 7.7793(6) Å                                                                                | β = 91.219(4)° |
|                                   | c = 42.007(3) Å                                                                                | γ = 90°        |
| Volume                            | 10448.0(14) Å <sup>3</sup>                                                                     |                |
| Z                                 | 12                                                                                             |                |
| Density (calculated)              | 1.406 mg/m <sup>3</sup>                                                                        |                |
| Absorption coefficient            | 0.779 mm <sup>-1</sup>                                                                         |                |
| F(000)                            | 4488.0                                                                                         |                |
| Crystal size                      | 0.26 x 0.24 x 0.22 mm <sup>3</sup>                                                             |                |
| Theta range for data collection   | 4.596 to 56.74°                                                                                |                |
| Index ranges                      | -42<=h<=42,-10<=k<=10,-56<=l<=55                                                               |                |
| Reflections collected             | 82669                                                                                          |                |
| Independent reflections           | 13058 [R <sub>int</sub> = 0.0587, R <sub>sigma</sub> = 0.0393]                                 |                |
| Completeness to theta = 28.370°   | 99.8%                                                                                          |                |
| Absorption correction             | Semi-empirical from equivalents                                                                |                |
| Max. and min transmission         | 0.746 and 0.673                                                                                |                |
| Refinement method                 | Full-matrix least-squares on F <sup>2</sup>                                                    |                |
| Data/restraints/parameters        | 13058/0/636                                                                                    |                |
| Goodness-of-fit on F <sup>2</sup> | 1.158                                                                                          |                |
| Final R indices [I>2 sigma(I)]    | R1 = 0.0386, wR2 = 0.1090                                                                      |                |
| R indices (all data)              | R1 = 0.0549 R2 = 0.1209                                                                        |                |
| Largest diff. peak and hole       | 0.62 and -0.66 e.Å <sup>-3</sup>                                                               |                |

Table S 4. Crystallographic data for [NiL<sub>2</sub>] $\cdot$ 2SO<sub>2</sub>

|                                   |                                                                                |                              |
|-----------------------------------|--------------------------------------------------------------------------------|------------------------------|
| Identification code               | 2dece_0m_a                                                                     | 2348656                      |
| Empirical formula                 | C <sub>42</sub> H <sub>28</sub> N <sub>2</sub> NiO <sub>4</sub> S <sub>4</sub> |                              |
| Molecular weight                  | 811.61                                                                         |                              |
| Temperature                       | 100 K                                                                          |                              |
| Wavelength                        | 0.71073 Å                                                                      |                              |
| Crystal system                    | monoclinic                                                                     |                              |
| Space group                       | P2 <sub>1</sub> /n                                                             |                              |
| Unit cell dimensions              | a = 11.0523(3) Å                                                               | $\alpha = 90^\circ$          |
|                                   | b = 19.6399(6) Å                                                               | $\beta = 100.2670(10)^\circ$ |
|                                   | c = 16.1066(5) Å                                                               | $\gamma = 90^\circ$          |
| Volume                            | 3440.22(18) Å <sup>3</sup>                                                     |                              |
| Z                                 | 4                                                                              |                              |
| Density (calculated)              | 1.567 mg/m <sup>3</sup>                                                        |                              |
| Absorption coefficient            | 0.857 mm <sup>-1</sup>                                                         |                              |
| F(000)                            | 1672.0                                                                         |                              |
| Crystal size                      | 0.26 x 0.24 x 0.22 mm <sup>3</sup>                                             |                              |
| Theta range for data collection   | 4.596 to 56.74°                                                                |                              |
| Index ranges                      | -14 ≤ h ≤ 14, -26 ≤ k ≤ 26, -21 ≤ l ≤ 21                                       |                              |
| Reflections collected             | 54743                                                                          |                              |
| Independent reflections           | 8565 [R <sub>int</sub> = 0.0527, R <sub>sigma</sub> = 0.0356]                  |                              |
| Completeness to theta = 28.323°   | 99.9%                                                                          |                              |
| Absorption correction             | Semi-empirical from equivalents                                                |                              |
| Max. and min transmission         | 0.746 and 0.693                                                                |                              |
| Refinement method                 | Full-matrix least-squares on F <sup>2</sup>                                    |                              |
| Data/restraints/parameters        | 8571/0/478                                                                     |                              |
| Goodness-of-fit on F <sup>2</sup> | 1.193                                                                          |                              |
| Final R indices [I > 2 sigma(I)]  | R1 = 0.0365, wR2 = 0.0729                                                      |                              |
| R indices (all data)              | R1 = 0.0529 R2 = 0.0829                                                        |                              |
| Largest diff. peak and hole       | 0.69 and -0.52 e.Å <sup>-3</sup>                                               |                              |

Figure S 34. Optimized structures and computed SO<sub>2</sub> free energies.

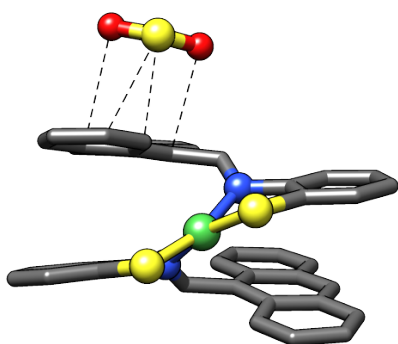

$$\Delta G_{\text{SO}_2} = +1.40 \text{ kcal/mol}$$

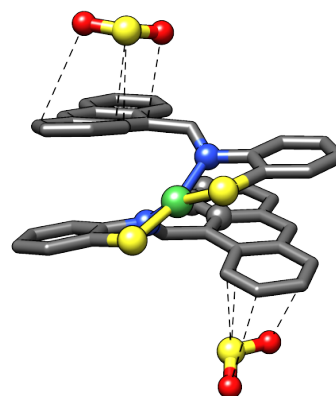

$$\Delta G_{\text{SO}_2} = +0.62 \text{ kcal/mol}$$

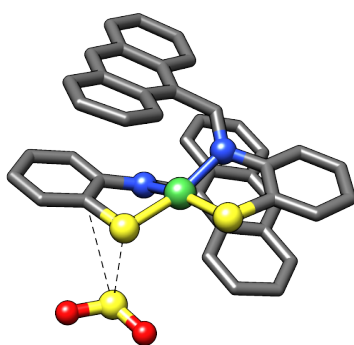

$$\Delta G_{\text{SO}_2} = -4.18 \text{ kcal/mol}$$

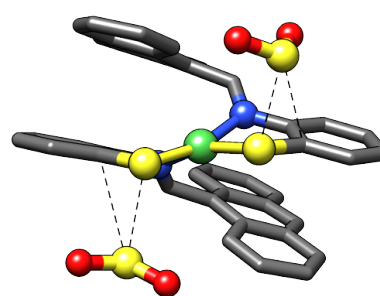

$$\Delta G_{\text{SO}_2} = -7.15 \text{ kcal/mol}$$

Optimized structures (in Å) and computed SO<sub>2</sub> free energies (in kcal/mol) bound to [NiL<sub>2</sub>] species in different orientations and stoichiometry.

Figure S 35. Superposition of Zn- and Cd-optimized structures on the [NiL<sub>2</sub>] complex

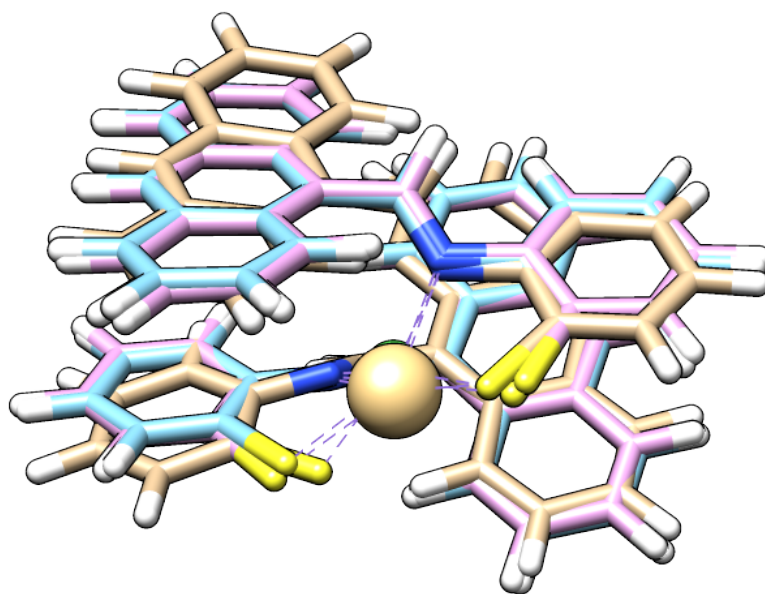

Figure S 36. Optimized structures of Ni-complex in singlet (S=0) and triplet (S=1).

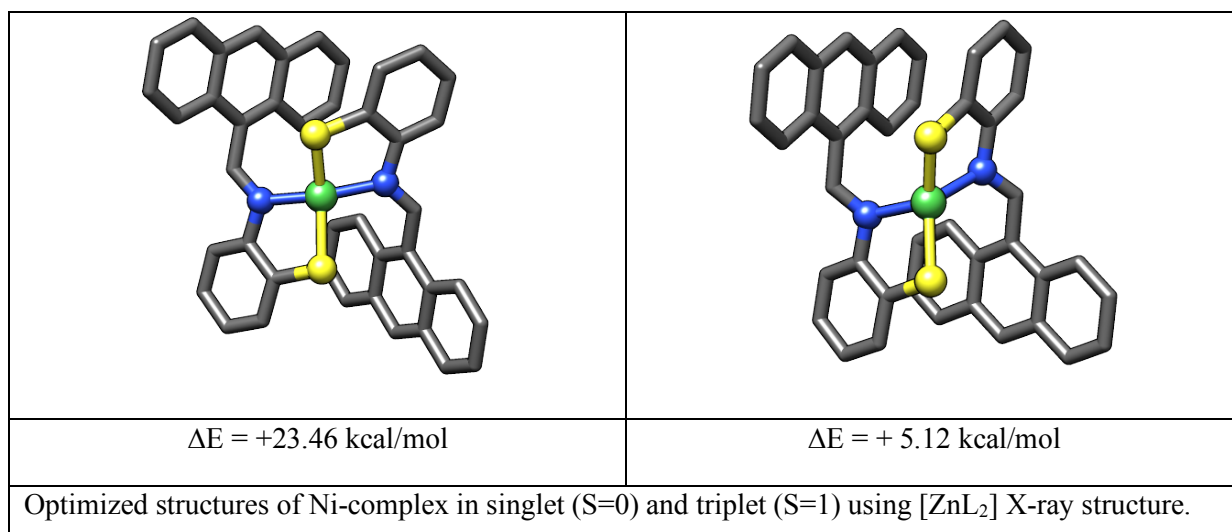

Figure S 37. Highest Occupied Molecular Orbital (HOMO) of SO<sub>2</sub>.

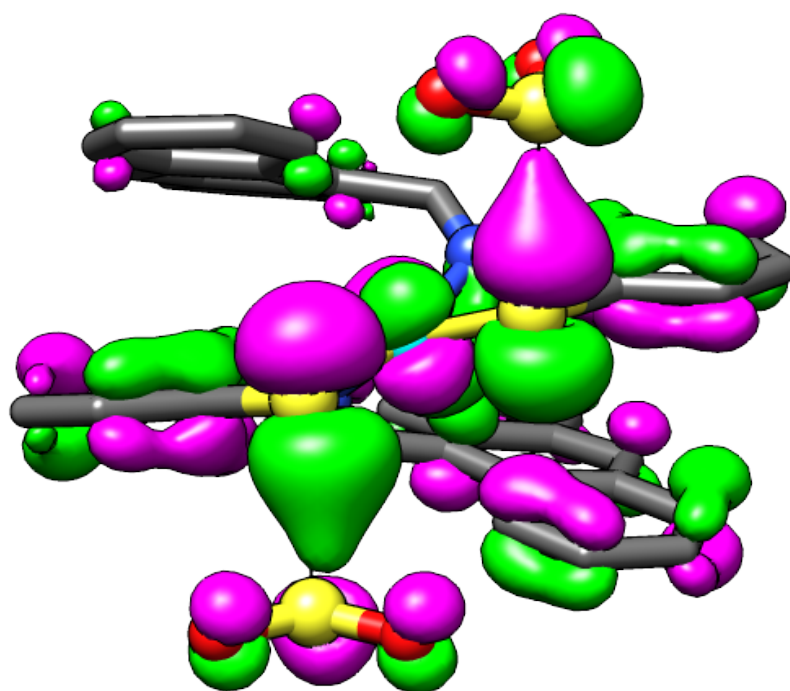

Highest Occupied Molecular orbital (HOMO) of SO<sub>2</sub> indicating the favorable interaction of SO<sub>2</sub> with the thiolate of [NiL<sub>2</sub>] molecule (contour value: 0.03 a.u)

Table S 5. Optimized coordinates (in Å) of Ni, Zn and Cd complexes.

**[NiL<sub>2</sub>]**

|    |              |             |              |
|----|--------------|-------------|--------------|
| Ni | 8.320232000  | 6.396149000 | 11.381054000 |
| S  | 8.800166000  | 6.070426000 | 9.256977000  |
| S  | 6.313375000  | 7.098108000 | 10.812918000 |
| N  | 7.889035000  | 7.119050000 | 13.230191000 |
| N  | 10.025678000 | 5.364409000 | 11.771827000 |
| C  | 10.522087000 | 5.857688000 | 9.484012000  |
| C  | 11.011700000 | 5.541127000 | 10.760758000 |
| C  | 6.499808000  | 7.060157000 | 13.533912000 |
| C  | 7.356092000  | 3.859649000 | 12.368551000 |
| H  | 7.957850000  | 3.908742000 | 11.474346000 |
| C  | 5.997148000  | 6.990176000 | 14.830316000 |
| H  | 6.674044000  | 6.893551000 | 15.669091000 |
| C  | 12.379152000 | 5.421011000 | 10.992142000 |
| H  | 12.745643000 | 5.261838000 | 11.997806000 |
| C  | 9.955747000  | 4.041472000 | 15.098794000 |
| C  | 10.492617000 | 9.184827000 | 10.393324000 |
| H  | 9.871023000  | 9.493960000 | 9.564048000  |
| C  | 7.977935000  | 3.954161000 | 13.645536000 |
| C  | 11.899795000 | 9.149105000 | 10.242577000 |
| H  | 12.343712000 | 9.415738000 | 9.292620000  |
| C  | 5.182828000  | 3.598974000 | 13.398991000 |
| H  | 4.111371000  | 3.504032000 | 13.283299000 |



|   |              |             |              |
|---|--------------|-------------|--------------|
| C | 6.006036000  | 3.696698000 | 12.251805000 |
| H | 5.560911000  | 3.659897000 | 11.266741000 |
| C | 13.276605000 | 5.571348000 | 9.946572000  |
| H | 14.340232000 | 5.504162000 | 10.132787000 |
| C | 4.258108000  | 7.089950000 | 12.661634000 |
| H | 3.583660000  | 7.113833000 | 11.815481000 |
| C | 8.682049000  | 7.716581000 | 14.046894000 |
| H | 8.248218000  | 8.119664000 | 14.959106000 |
| C | 10.118331000 | 7.903802000 | 13.883015000 |
| C | 3.761613000  | 7.048664000 | 13.954656000 |
| H | 2.690492000  | 7.041860000 | 14.115090000 |
| C | 5.744675000  | 3.603713000 | 14.639072000 |
| H | 5.132901000  | 3.497395000 | 15.526040000 |
| C | 9.362026000  | 4.183203000 | 13.821085000 |
| C | 7.151098000  | 3.750859000 | 14.804167000 |
| C | 11.439937000 | 5.987817000 | 8.436273000  |
| H | 11.073245000 | 6.223577000 | 7.445726000  |
| C | 9.119784000  | 3.775255000 | 16.235916000 |
| C | 5.637371000  | 7.080013000 | 12.426851000 |
| C | 12.686441000 | 8.800286000 | 11.297515000 |
| H | 13.765472000 | 8.797084000 | 11.207866000 |
| C | 11.894161000 | 3.972495000 | 16.566202000 |
| H | 12.963236000 | 4.063688000 | 16.705122000 |
| C | 11.356827000 | 4.165227000 | 15.327509000 |

|   |              |             |              |
|---|--------------|-------------|--------------|
| H | 12.015299000 | 4.427153000 | 14.512774000 |
| C | 7.740572000  | 3.681241000 | 16.062028000 |
| H | 7.110695000  | 3.517915000 | 16.929376000 |
| C | 10.938574000 | 7.667548000 | 15.011425000 |
| C | 9.903204000  | 8.812344000 | 11.566134000 |
| H | 8.829394000  | 8.868783000 | 11.654586000 |
| C | 10.244808000 | 4.511533000 | 12.709212000 |
| H | 11.196086000 | 3.985825000 | 12.687686000 |
| C | 12.798584000 | 5.839707000 | 8.664981000  |
| H | 13.494195000 | 5.960473000 | 7.843708000  |
| C | 4.627745000  | 6.983173000 | 15.044955000 |
| H | 4.238262000  | 6.904474000 | 16.051213000 |
| C | 12.909700000 | 8.127786000 | 13.645485000 |
| H | 13.987660000 | 8.185459000 | 13.543864000 |
| C | 10.421708000 | 7.289776000 | 16.284341000 |
| H | 9.361648000  | 7.123172000 | 16.406624000 |
| C | 12.112415000 | 8.423783000 | 12.544774000 |
| C | 9.716530000  | 3.611270000 | 17.517912000 |
| H | 9.067886000  | 3.408135000 | 18.361692000 |
| C | 12.363366000 | 7.792845000 | 14.882970000 |
| C | 10.681299000 | 8.360373000 | 12.669249000 |
| C | 11.241823000 | 7.118314000 | 17.360447000 |
| H | 10.818728000 | 6.840635000 | 18.316484000 |
| C | 12.645176000 | 7.262384000 | 17.233634000 |

|   |              |             |              |
|---|--------------|-------------|--------------|
| H | 13.280246000 | 7.110205000 | 18.096850000 |
| C | 11.067213000 | 3.689169000 | 17.680473000 |
| H | 11.511883000 | 3.549871000 | 18.657461000 |
| C | 13.187693000 | 7.573435000 | 16.022817000 |
| H | 14.260139000 | 7.673796000 | 15.905629000 |

**[ZnL<sub>2</sub>]**

|    |             |              |              |
|----|-------------|--------------|--------------|
| Zn | 7.453425000 | 10.980623000 | 12.012455000 |
| S  | 8.275825000 | 11.780204000 | 10.030112000 |
| S  | 8.456569000 | 10.136256000 | 13.891746000 |
| N  | 6.260100000 | 9.645956000  | 10.832698000 |
| N  | 6.510066000 | 12.405054000 | 13.305448000 |
| C  | 6.084861000 | 8.418748000  | 11.169947000 |
| H  | 5.973704000 | 7.669149000  | 10.384637000 |
| C  | 5.279806000 | 8.588540000  | 13.529592000 |
| C  | 7.057477000 | 15.046506000 | 11.068298000 |
| C  | 6.366842000 | 13.634385000 | 12.962401000 |
| H  | 6.416113000 | 14.405982000 | 13.732915000 |
| C  | 6.939758000 | 6.894615000  | 12.901592000 |
| C  | 6.185377000 | 14.064442000 | 11.579275000 |
| C  | 7.033292000 | 6.488603000  | 14.274662000 |
| C  | 4.323846000 | 9.595722000  | 13.217954000 |
| H  | 4.199663000 | 9.900018000  | 12.191359000 |
| C  | 5.186135000 | 13.490081000 | 10.766932000 |
| C  | 8.621012000 | 5.236428000  | 12.333767000 |
| H  | 9.248411000 | 4.754929000  | 11.594700000 |
| C  | 6.973611000 | 11.389076000 | 7.659682000  |
| H  | 7.651468000 | 12.147234000 | 7.289065000  |
| C  | 6.083779000 | 7.960791000  | 12.555283000 |
| C  | 4.226347000 | 12.559141000 | 11.254708000 |

|   |             |              |              |
|---|-------------|--------------|--------------|
| H | 4.254661000 | 12.272971000 | 12.293690000 |
| C | 3.571166000 | 10.179983000 | 14.194006000 |
| H | 2.850454000 | 10.944081000 | 13.930223000 |
| C | 5.233033000 | 9.464509000  | 8.621403000  |
| H | 4.522443000 | 8.749546000  | 9.018422000  |
| C | 5.871874000 | 12.339883000 | 16.960378000 |
| H | 5.244668000 | 12.835926000 | 17.689400000 |
| C | 7.780268000 | 6.243343000  | 11.955624000 |
| H | 7.771355000 | 6.561571000  | 10.922257000 |
| C | 6.584126000 | 12.047987000 | 14.668207000 |
| C | 3.723169000 | 9.806907000  | 15.552212000 |
| H | 3.136240000 | 10.302312000 | 16.314074000 |
| C | 7.062804000 | 11.028576000 | 9.011523000  |
| C | 3.281531000 | 12.023346000 | 10.430400000 |
| H | 2.562862000 | 11.316167000 | 10.826111000 |
| C | 6.950896000 | 15.430463000 | 9.690271000  |
| C | 8.105274000 | 15.619539000 | 11.841655000 |
| H | 8.244348000 | 15.308165000 | 12.868014000 |
| C | 6.272107000 | 7.149706000  | 15.234453000 |
| H | 6.366110000 | 6.856378000  | 16.274079000 |
| C | 5.393710000 | 8.175098000  | 14.899975000 |
| C | 6.179342000 | 10.031281000 | 9.477458000  |
| C | 4.606714000 | 8.827962000  | 15.889927000 |
| H | 4.730365000 | 8.527459000  | 16.922609000 |

|   |             |              |              |
|---|-------------|--------------|--------------|
| C | 7.507556000 | 10.661404000 | 16.401060000 |
| H | 8.172571000 | 9.861773000  | 16.700868000 |
| C | 5.983233000 | 14.831453000 | 8.888844000  |
| H | 5.922176000 | 15.106825000 | 7.842008000  |
| C | 7.863578000 | 16.386176000 | 9.163700000  |
| H | 7.771029000 | 16.664412000 | 8.120825000  |
| C | 5.098308000 | 13.882097000 | 9.388449000  |
| C | 8.696840000 | 4.824667000  | 13.687663000 |
| H | 9.376559000 | 4.030262000  | 13.968120000 |
| C | 7.927404000 | 5.440049000  | 14.629416000 |
| H | 7.988712000 | 5.147359000  | 15.670613000 |
| C | 8.963102000 | 16.533138000 | 11.300236000 |
| H | 9.754917000 | 16.952943000 | 11.907436000 |
| C | 7.446739000 | 10.994115000 | 15.040279000 |
| C | 6.051450000 | 10.802163000 | 6.811008000  |
| H | 6.008879000 | 11.110076000 | 5.773408000  |
| C | 5.795037000 | 12.691379000 | 15.623429000 |
| H | 5.089427000 | 13.448277000 | 15.302838000 |
| C | 8.841564000 | 16.926710000 | 9.944012000  |
| H | 9.536497000 | 17.646778000 | 9.531445000  |
| C | 6.744782000 | 11.325267000 | 17.346048000 |
| H | 6.814080000 | 11.035842000 | 18.387542000 |
| C | 4.109577000 | 13.283220000 | 8.557968000  |
| H | 4.078153000 | 13.566373000 | 7.513355000  |

|   |             |              |             |
|---|-------------|--------------|-------------|
| C | 3.228841000 | 12.374461000 | 9.058523000 |
| H | 2.487757000 | 11.917953000 | 8.415880000 |
| C | 5.165709000 | 9.839468000  | 7.290548000 |
| H | 4.419512000 | 9.402715000  | 6.639875000 |

**[CdL<sub>2</sub>]**

|    |              |              |              |
|----|--------------|--------------|--------------|
| Cd | 7.992640000  | 0.918109000  | 25.994454000 |
| S  | 5.575652000  | 1.250820000  | 26.216268000 |
| S  | 9.864302000  | -0.623688000 | 26.345841000 |
| N  | 7.974341000  | 3.029358000  | 27.133023000 |
| N  | 8.925228000  | 0.892239000  | 23.784394000 |
| C  | 10.676649000 | 2.205045000  | 29.280315000 |
| C  | 10.191081000 | 2.746091000  | 28.068925000 |
| C  | 9.891900000  | 2.141216000  | 30.467537000 |
| H  | 8.872345000  | 2.499428000  | 30.456180000 |
| C  | 11.010490000 | 2.776705000  | 26.917093000 |
| C  | 10.396552000 | 1.615681000  | 31.622211000 |
| H  | 9.780719000  | 1.586300000  | 32.512002000 |
| C  | 11.999822000 | 1.649763000  | 29.324915000 |
| C  | 12.325632000 | 2.199981000  | 26.977143000 |
| C  | 6.600481000  | 5.004297000  | 27.493455000 |
| H  | 7.496615000  | 5.555113000  | 27.751733000 |
| C  | 5.375632000  | 5.648065000  | 27.485219000 |
| H  | 5.308355000  | 6.692305000  | 27.761312000 |
| C  | 11.712205000 | 1.091015000  | 31.667589000 |
| H  | 12.091159000 | 0.673414000  | 32.591382000 |
| C  | 10.737975000 | -0.341553000 | 24.846585000 |
| C  | 6.851005000  | 1.575883000  | 22.756892000 |
| C  | 10.212458000 | 0.331735000  | 23.719334000 |



|   |              |              |              |
|---|--------------|--------------|--------------|
| C | 4.349023000  | 3.618638000  | 26.700565000 |
| H | 3.469142000  | 3.075166000  | 26.381331000 |
| C | 5.577302000  | 2.940596000  | 26.698439000 |
| C | 12.777467000 | 1.647376000  | 28.170492000 |
| H | 13.768276000 | 1.208728000  | 28.204841000 |
| C | 12.484977000 | 1.100484000  | 30.545077000 |
| H | 13.485950000 | 0.686611000  | 30.559237000 |
| C | 8.146574000  | 0.896844000  | 22.765872000 |
| H | 8.439623000  | 0.351802000  | 21.865224000 |
| C | 4.241947000  | 4.940462000  | 27.094776000 |
| H | 3.274476000  | 5.427048000  | 27.077266000 |
| C | 6.717057000  | 3.659351000  | 27.127439000 |
| C | 5.721431000  | 0.858718000  | 22.309017000 |
| C | 10.621553000 | 3.399084000  | 25.698117000 |
| H | 9.650875000  | 3.860672000  | 25.633342000 |
| C | 6.726862000  | 2.913972000  | 23.192084000 |
| C | 8.831495000  | 3.279879000  | 28.054106000 |
| H | 8.533379000  | 3.904750000  | 28.898672000 |
| C | 5.792034000  | -0.492928000 | 21.866381000 |
| H | 6.741860000  | -1.009237000 | 21.872640000 |
| C | 12.038022000 | -0.857630000 | 24.741341000 |
| H | 12.447462000 | -1.379877000 | 25.596231000 |
| C | 7.840150000  | 3.722337000  | 23.555908000 |
| H | 8.829433000  | 3.299779000  | 23.506284000 |

|   |              |              |              |
|---|--------------|--------------|--------------|
| C | 5.424718000  | 3.519771000  | 23.232127000 |
| C | 10.996272000 | 0.498059000  | 22.572836000 |
| H | 10.599602000 | 1.076676000  | 21.747635000 |
| C | 11.450555000 | 3.411144000  | 24.614588000 |
| H | 11.126800000 | 3.890017000  | 23.698928000 |
| C | 13.149900000 | 2.216491000  | 25.816528000 |
| H | 14.125219000 | 1.750000000  | 25.875196000 |
| C | 7.673556000  | 5.011384000  | 23.969582000 |
| H | 8.539434000  | 5.602199000  | 24.241908000 |
| C | 12.793049000 | -0.711508000 | 23.591080000 |
| H | 13.795703000 | -1.119257000 | 23.554292000 |
| C | 6.383270000  | 5.589416000  | 24.055073000 |
| H | 6.271044000  | 6.604421000  | 24.411513000 |
| C | 5.293114000  | 4.861202000  | 23.689612000 |
| H | 4.299716000  | 5.287956000  | 23.743855000 |
| C | 4.429979000  | 1.484169000  | 22.346834000 |
| C | 4.675474000  | -1.159783000 | 21.450950000 |
| H | 4.756761000  | -2.185166000 | 21.113511000 |
| C | 4.316727000  | 2.787137000  | 22.822340000 |
| H | 3.335864000  | 3.246653000  | 22.870443000 |
| C | 12.727189000 | 2.801256000  | 24.662656000 |
| H | 13.355327000 | 2.798774000  | 23.782595000 |
| C | 12.278187000 | -0.018583000 | 22.498738000 |
| H | 12.874279000 | 0.131431000  | 21.608052000 |

|   |             |              |              |
|---|-------------|--------------|--------------|
| C | 3.404955000 | -0.532041000 | 21.472555000 |
| H | 2.530790000 | -1.081068000 | 21.147124000 |
| C | 3.288913000 | 0.751146000  | 21.916555000 |
| H | 2.321994000 | 1.238157000  | 21.954410000 |

**[NiL<sub>2</sub>] without SO<sub>2</sub>**

|    |             |              |              |
|----|-------------|--------------|--------------|
| Ni | 5.332932000 | 12.378611000 | 3.709384000  |
| S  | 5.507709000 | 12.000649000 | 1.544214000  |
| S  | 7.476281000 | 12.845760000 | 3.929161000  |
| N  | 3.414781000 | 12.431779000 | 3.429603000  |
| N  | 5.273560000 | 12.278406000 | 5.650441000  |
| C  | 1.900020000 | 15.700463000 | 8.218352000  |
| H  | 2.210622000 | 16.473668000 | 8.910625000  |
| C  | 4.464127000 | 16.204224000 | 5.549693000  |
| C  | 1.344170000 | 10.150330000 | 1.323753000  |
| H  | 0.370434000 | 9.679127000  | 1.307315000  |
| C  | 5.800315000 | 16.042557000 | 3.098123000  |
| H  | 6.310083000 | 15.992039000 | 2.145382000  |
| C  | 2.643869000 | 15.535500000 | 7.016976000  |
| C  | 3.749914000 | 16.332898000 | 6.735093000  |
| H  | 4.061396000 | 17.077758000 | 7.458454000  |
| C  | 3.522177000 | 10.485149000 | 0.330260000  |
| H  | 4.233480000 | 10.287722000 | -0.461239000 |
| C  | 4.068147000 | 15.212475000 | 4.585396000  |
| C  | 3.778620000 | 10.348540000 | 5.871069000  |
| C  | 2.254722000 | 9.925515000  | 0.291698000  |
| H  | 1.979142000 | 9.287480000  | -0.538940000 |
| C  | 2.966592000 | 11.544239000 | 2.414348000  |
| C  | 0.997471000 | 10.545224000 | 8.361380000  |

|   |             |              |             |
|---|-------------|--------------|-------------|
| H | 0.723642000 | 11.117710000 | 9.238087000 |
| C | 3.910863000 | 11.290963000 | 1.405395000 |
| C | 6.143544000 | 13.212098000 | 6.274084000 |
| C | 2.157527000 | 10.837139000 | 7.704191000 |
| H | 2.762769000 | 11.658022000 | 8.059296000 |
| C | 1.681526000 | 9.072764000  | 6.082095000 |
| C | 2.607674000 | 13.269936000 | 3.976618000 |
| H | 1.553348000 | 13.209009000 | 3.711485000 |
| C | 2.565910000 | 10.099652000 | 6.558611000 |
| C | 2.257282000 | 14.511638000 | 6.085230000 |
| C | 1.142797000 | 13.695823000 | 6.426232000 |
| H | 0.855974000 | 12.882569000 | 5.774507000 |
| C | 5.908269000 | 13.770675000 | 7.524801000 |
| H | 4.988890000 | 13.551553000 | 8.052505000 |
| C | 5.579040000 | 17.043876000 | 5.271113000 |
| H | 5.886205000 | 17.752529000 | 6.029680000 |
| C | 7.281822000 | 13.548668000 | 5.523186000 |
| C | 7.975870000 | 14.980512000 | 7.345142000 |
| H | 8.691653000 | 15.680469000 | 7.758466000 |
| C | 4.747414000 | 15.206767000 | 3.334289000 |
| H | 4.434788000 | 14.533583000 | 2.553703000 |
| C | 6.242524000 | 16.954915000 | 4.085308000 |
| H | 7.098142000 | 17.587828000 | 3.887201000 |
| C | 6.822234000 | 14.665340000 | 8.061471000 |

|   |              |              |             |
|---|--------------|--------------|-------------|
| H | 6.627486000  | 15.127419000 | 9.020452000 |
| C | 5.457290000  | 9.561977000  | 4.196183000 |
| H | 6.216152000  | 10.211522000 | 4.602320000 |
| C | 8.204554000  | 14.431212000 | 6.092550000 |
| H | 9.090275000  | 14.698186000 | 5.530807000 |
| C | 4.634377000  | 11.419000000 | 6.364894000 |
| H | 4.747255000  | 11.488628000 | 7.444575000 |
| C | 4.165364000  | 9.520872000  | 4.789528000 |
| C | 0.467923000  | 8.816629000  | 6.778643000 |
| H | -0.183548000 | 8.036637000  | 6.402716000 |
| C | 0.819889000  | 14.913259000 | 8.492051000 |
| H | 0.255909000  | 15.053739000 | 9.405001000 |
| C | 3.003258000  | 14.332945000 | 4.899075000 |
| C | 1.700221000  | 10.971359000 | 2.383672000 |
| H | 1.013101000  | 11.129449000 | 3.205362000 |
| C | 0.439407000  | 13.900343000 | 7.578156000 |
| H | -0.406071000 | 13.264686000 | 7.805531000 |
| C | 3.238465000  | 8.540119000  | 4.292160000 |
| C | 0.136850000  | 9.521377000  | 7.897634000 |
| H | -0.781382000 | 9.307891000  | 8.429832000 |
| C | 2.025734000  | 8.350271000  | 4.942569000 |
| H | 1.336337000  | 7.604585000  | 4.562691000 |
| C | 4.811425000  | 7.893109000  | 2.568589000 |
| H | 5.065643000  | 7.307895000  | 1.694561000 |

|   |             |             |             |
|---|-------------|-------------|-------------|
| C | 3.588898000 | 7.762514000 | 3.153717000 |
| H | 2.858416000 | 7.062856000 | 2.767301000 |
| C | 5.765715000 | 8.779940000 | 3.121330000 |
| H | 6.749786000 | 8.854432000 | 2.678863000 |

**[NiL<sub>2</sub>] with one SO<sub>2</sub> bound at the Thiolate site**

|    |             |              |              |
|----|-------------|--------------|--------------|
| Ni | 5.313857000 | 12.423044000 | 3.663707000  |
| S  | 5.447629000 | 12.054295000 | 1.500531000  |
| S  | 7.437746000 | 12.984427000 | 3.823292000  |
| N  | 3.390044000 | 12.450800000 | 3.425558000  |
| N  | 5.303874000 | 12.309002000 | 5.606228000  |
| C  | 1.903254000 | 15.680871000 | 8.250862000  |
| H  | 2.224688000 | 16.443849000 | 8.949635000  |
| C  | 4.443161000 | 16.205449000 | 5.562635000  |
| C  | 1.315131000 | 10.130676000 | 1.366058000  |
| H  | 0.349309000 | 9.643217000  | 1.369938000  |
| C  | 5.717707000 | 16.102691000 | 3.074983000  |
| H  | 6.198605000 | 16.081465000 | 2.106105000  |
| C  | 2.639564000 | 15.520896000 | 7.043651000  |
| C  | 3.748112000 | 16.314946000 | 6.761645000  |
| H  | 4.070828000 | 17.048334000 | 7.491697000  |
| C  | 3.469783000 | 10.495302000 | 0.331802000  |
| H  | 4.170746000 | 10.304975000 | -0.470268000 |
| C  | 4.030836000 | 15.229354000 | 4.589561000  |
| C  | 3.825080000 | 10.367269000 | 5.825463000  |
| C  | 2.211170000 | 9.914218000  | 0.319695000  |
| H  | 1.932025000 | 9.266118000  | -0.501799000 |
| C  | 2.933451000 | 11.554962000 | 2.420662000  |



|   |             |              |             |
|---|-------------|--------------|-------------|
| C | 1.037595000 | 10.550714000 | 8.310165000 |
| H | 0.763424000 | 11.114543000 | 9.192367000 |
| C | 3.861665000 | 11.313405000 | 1.395438000 |
| C | 6.181900000 | 13.240977000 | 6.225071000 |
| C | 2.203037000 | 10.842066000 | 7.662185000 |
| H | 2.811197000 | 11.655586000 | 8.029671000 |
| C | 1.727735000 | 9.092421000  | 6.023163000 |
| C | 2.581395000 | 13.277290000 | 3.988158000 |
| H | 1.524516000 | 13.198954000 | 3.739690000 |
| C | 2.612359000 | 10.113995000 | 6.510864000 |
| C | 2.238475000 | 14.510334000 | 6.103406000 |
| C | 1.115763000 | 13.703821000 | 6.440235000 |
| H | 0.814365000 | 12.902585000 | 5.780861000 |
| C | 5.989496000 | 13.759072000 | 7.500825000 |
| H | 5.096677000 | 13.512507000 | 8.060640000 |
| C | 5.548546000 | 17.054755000 | 5.274883000 |
| H | 5.870392000 | 17.750462000 | 6.039422000 |
| C | 7.284509000 | 13.629172000 | 5.451935000 |
| C | 8.044809000 | 14.992096000 | 7.288984000 |
| H | 8.775799000 | 15.673366000 | 7.705632000 |
| C | 4.679051000 | 15.252155000 | 3.322045000 |
| H | 4.347867000 | 14.593436000 | 2.536324000 |
| C | 6.181227000 | 16.995760000 | 4.070367000 |
| H | 7.026547000 | 17.639025000 | 3.862838000 |

|   |              |              |             |
|---|--------------|--------------|-------------|
| C | 6.918392000  | 14.643049000 | 8.029891000 |
| H | 6.758420000  | 15.065873000 | 9.013173000 |
| C | 5.507830000  | 9.588742000  | 4.155444000 |
| H | 6.256952000  | 10.237228000 | 4.576158000 |
| C | 8.227871000  | 14.490960000 | 6.008708000 |
| H | 9.095748000  | 14.768267000 | 5.425940000 |
| C | 4.678443000  | 11.438595000 | 6.320996000 |
| H | 4.803156000  | 11.498351000 | 7.399865000 |
| C | 4.215438000  | 9.543150000  | 4.742254000 |
| C | 0.506861000  | 8.840227000  | 6.708437000 |
| H | -0.147028000 | 8.067684000  | 6.321820000 |
| C | 0.814287000  | 14.904990000 | 8.519054000 |
| H | 0.253698000  | 15.043173000 | 9.434620000 |
| C | 2.975777000  | 14.340716000 | 4.909925000 |
| C | 1.675692000  | 10.963051000 | 2.415417000 |
| H | 1.000972000  | 11.111786000 | 3.248885000 |
| C | 0.417624000  | 13.907106000 | 7.595615000 |
| H | -0.438071000 | 13.283243000 | 7.817561000 |
| C | 3.295885000  | 8.557213000  | 4.242591000 |
| C | 0.171814000  | 9.538798000  | 7.830357000 |
| H | -0.752194000 | 9.328579000  | 8.353507000 |
| C | 2.078450000  | 8.370012000  | 4.884975000 |
| H | 1.390273000  | 7.625027000  | 4.501561000 |
| C | 4.890766000  | 7.903720000  | 2.539873000 |

|   |              |              |             |
|---|--------------|--------------|-------------|
| H | 5.157854000  | 7.307702000  | 1.676833000 |
| C | 3.661686000  | 7.773584000  | 3.112840000 |
| H | 2.939013000  | 7.066073000  | 2.725885000 |
| C | 5.837222000  | 8.799912000  | 3.091701000 |
| H | 6.832179000  | 8.873371000  | 2.673601000 |
| S | 8.868958000  | 10.753895000 | 4.719065000 |
| O | 10.019533000 | 11.437887000 | 5.275247000 |
| O | 9.059550000  | 10.047378000 | 3.466390000 |

**[NiL<sub>2</sub>] with two SO<sub>2</sub> bound at thiolate sites**

81

symmetry c1

|    |             |              |              |
|----|-------------|--------------|--------------|
| Ni | 5.337712000 | 12.412868000 | 3.623169000  |
| S  | 5.491105000 | 11.839431000 | 1.502991000  |
| S  | 7.462164000 | 12.951726000 | 3.768170000  |
| N  | 3.413243000 | 12.454493000 | 3.378581000  |
| N  | 5.334385000 | 12.322130000 | 5.564986000  |
| C  | 1.847907000 | 15.597336000 | 8.222288000  |
| H  | 2.171291000 | 16.323859000 | 8.958136000  |
| C  | 4.467163000 | 16.162476000 | 5.619084000  |
| C  | 1.288204000 | 10.101310000 | 1.409076000  |
| H  | 0.294462000 | 9.673169000  | 1.413860000  |
| C  | 5.775308000 | 16.135102000 | 3.143466000  |
| H  | 6.244639000 | 16.153288000 | 2.169922000  |
| C  | 2.613421000 | 15.460616000 | 7.030130000  |
| C  | 3.745618000 | 16.240586000 | 6.804647000  |
| H  | 4.061559000 | 16.943130000 | 7.567451000  |
| C  | 3.488072000 | 10.261527000 | 0.434357000  |
| H  | 4.207673000 | 9.971218000  | -0.319508000 |
| C  | 4.064884000 | 15.223920000 | 4.606051000  |
| C  | 3.847597000 | 10.387303000 | 5.792516000  |
| C  | 2.200298000 | 9.746631000  | 0.418712000  |

|   |             |              |              |
|---|-------------|--------------|--------------|
| H | 1.912968000 | 9.048293000  | -0.356810000 |
| C | 2.942814000 | 11.525636000 | 2.410514000  |
| C | 1.027227000 | 10.631374000 | 8.232707000  |
| H | 0.749681000 | 11.203228000 | 9.108540000  |
| C | 3.876957000 | 11.145295000 | 1.438582000  |
| C | 6.228420000 | 13.245717000 | 6.175162000  |
| C | 2.204915000 | 10.903466000 | 7.598804000  |
| H | 2.820011000 | 11.710206000 | 7.970096000  |
| C | 1.728680000 | 9.146890000  | 5.966397000  |
| C | 2.609207000 | 13.300516000 | 3.920138000  |
| H | 1.557696000 | 13.237675000 | 3.650509000  |
| C | 2.619566000 | 10.161259000 | 6.458704000  |
| C | 2.212638000 | 14.494606000 | 6.042795000  |
| C | 1.052947000 | 13.716356000 | 6.315510000  |
| H | 0.742224000 | 12.951905000 | 5.617913000  |
| C | 6.057135000 | 13.764193000 | 7.453638000  |
| H | 5.169961000 | 13.525514000 | 8.025374000  |
| C | 5.584571000 | 17.009959000 | 5.377022000  |
| H | 5.898636000 | 17.680384000 | 6.167026000  |
| C | 7.325059000 | 13.621568000 | 5.389691000  |
| C | 8.115139000 | 14.987190000 | 7.209532000  |
| H | 8.852428000 | 15.669417000 | 7.612908000  |
| C | 4.730226000 | 15.281532000 | 3.351734000  |
| H | 4.368157000 | 14.684197000 | 2.532389000  |

|   |              |              |             |
|---|--------------|--------------|-------------|
| C | 6.231529000  | 16.986791000 | 4.178170000 |
| H | 7.080208000  | 17.635073000 | 4.002073000 |
| C | 6.998476000  | 14.643494000 | 7.967373000 |
| H | 6.854238000  | 15.069581000 | 8.951585000 |
| C | 5.567696000  | 9.534423000  | 4.198361000 |
| H | 6.311162000  | 10.191163000 | 4.616631000 |
| C | 8.280203000  | 14.480876000 | 5.928889000 |
| H | 9.141563000  | 14.752417000 | 5.334214000 |
| C | 4.707377000  | 11.456955000 | 6.283759000 |
| H | 4.837616000  | 11.519053000 | 7.362002000 |
| C | 4.255440000  | 9.530516000  | 4.741494000 |
| C | 0.491049000  | 8.922219000  | 6.631082000 |
| H | -0.169556000 | 8.158136000  | 6.239155000 |
| C | 0.726820000  | 14.848546000 | 8.429197000 |
| H | 0.143906000  | 14.970706000 | 9.332929000 |
| C | 2.987971000  | 14.343768000 | 4.869161000 |
| C | 1.658341000  | 10.994255000 | 2.404164000 |
| H | 0.961122000  | 11.241948000 | 3.193606000 |
| C | 0.324590000  | 13.902710000 | 7.455025000 |
| H | -0.560482000 | 13.304031000 | 7.625446000 |
| C | 3.335096000  | 8.545286000  | 4.242295000 |
| C | 0.151431000  | 9.632354000  | 7.744217000 |
| H | -0.783829000 | 9.440868000  | 8.254320000 |
| C | 2.094594000  | 8.397774000  | 4.851036000 |

|   |              |              |              |
|---|--------------|--------------|--------------|
| H | 1.404197000  | 7.655882000  | 4.465512000  |
| C | 4.981984000  | 7.791474000  | 2.632492000  |
| H | 5.272277000  | 7.151752000  | 1.808959000  |
| C | 3.727239000  | 7.712386000  | 3.157173000  |
| H | 3.005689000  | 7.003774000  | 2.770048000  |
| C | 5.922800000  | 8.693983000  | 3.183220000  |
| H | 6.935802000  | 8.729979000  | 2.806571000  |
| S | 8.915830000  | 10.779236000 | 4.803181000  |
| O | 10.103498000 | 11.515905000 | 5.182698000  |
| O | 9.021387000  | 9.899237000  | 3.654513000  |
| S | 4.673941000  | 13.912121000 | -0.174427000 |
| O | 3.359293000  | 14.115916000 | 0.414260000  |
| O | 5.664933000  | 14.936178000 | 0.099337000  |

**[NiL<sub>2</sub>] with SO<sub>2</sub> on the arene site**

78

symmetry c1

|    |             |              |              |
|----|-------------|--------------|--------------|
| Ni | 5.309741444 | 12.365689407 | 3.646192332  |
| S  | 5.442095712 | 11.964729065 | 1.484747311  |
| S  | 7.462777887 | 12.796349527 | 3.808846983  |
| N  | 3.384542557 | 12.432269928 | 3.405633911  |
| N  | 5.304826705 | 12.243022168 | 5.590572667  |
| C  | 1.874926535 | 15.596946276 | 8.271838782  |
| H  | 2.192047225 | 16.345719473 | 8.987710357  |
| C  | 4.465143656 | 16.135050925 | 5.633158968  |
| C  | 1.253538875 | 10.166538184 | 1.343218713  |
| H  | 0.272452712 | 9.710424014  | 1.345189353  |
| C  | 5.784950975 | 16.048410988 | 3.168233747  |
| H  | 6.286208938 | 16.030564263 | 2.209826152  |
| C  | 2.631129783 | 15.446745923 | 7.075412277  |
| C  | 3.751402411 | 16.234536618 | 6.822217373  |
| H  | 4.067936879 | 16.955766796 | 7.566889246  |
| C  | 3.424009353 | 10.456389011 | 0.320961718  |
| H  | 4.123684083 | 10.239397414 | -0.475719552 |
| C  | 4.062133413 | 15.174636886 | 4.640461682  |
| C  | 3.792731382 | 10.334360419 | 5.787914431  |
| C  | 2.149436926 | 9.912306024  | 0.304855230  |
| H  | 1.856351588 | 9.265041951  | -0.512488173 |



|   |             |              |             |
|---|-------------|--------------|-------------|
| C | 2.908969175 | 11.551353271 | 2.397731966 |
| C | 1.016707867 | 10.514536473 | 8.280783264 |
| H | 0.759694373 | 11.056837582 | 9.181467178 |
| C | 3.835377671 | 11.273461681 | 1.379104434 |
| C | 6.215763683 | 13.144988612 | 6.203817591 |
| C | 2.190150056 | 10.791461589 | 7.641147408 |
| H | 2.826178680 | 11.570677459 | 8.034012286 |
| C | 1.667248569 | 9.101008265  | 5.955097151 |
| C | 2.586402880 | 13.257411239 | 3.985631528 |
| H | 1.528023580 | 13.195654550 | 3.740114637 |
| C | 2.576287271 | 10.088161667 | 6.467381554 |
| C | 2.235022525 | 14.455420085 | 6.113453257 |
| C | 1.099579374 | 13.654560633 | 6.419866115 |
| H | 0.804436685 | 12.863270732 | 5.745886126 |
| C | 6.038548461 | 13.680090233 | 7.473740281 |
| H | 5.139916495 | 13.459567717 | 8.035506857 |
| C | 5.580002463 | 16.980998226 | 5.373934047 |
| H | 5.892315482 | 17.666746185 | 6.151303295 |
| C | 7.332068275 | 13.477389624 | 5.419513798 |
| C | 8.113265692 | 14.869038003 | 7.235417824 |
| H | 8.852608844 | 15.553656762 | 7.632828546 |
| C | 4.735832308 | 15.203244467 | 3.387005539 |
| H | 4.415589170 | 14.554439599 | 2.588330186 |
| C | 6.233139831 | 16.930986187 | 4.179878828 |

|   |              |              |             |
|---|--------------|--------------|-------------|
| H | 7.084826489  | 17.572434438 | 3.993710451 |
| C | 6.984203212  | 14.554212212 | 7.989603663 |
| H | 6.833932072  | 14.998667109 | 8.964635499 |
| C | 5.472302033  | 9.542311848  | 4.122780327 |
| H | 6.221863091  | 10.213823859 | 4.508772235 |
| C | 8.287954050  | 14.337668241 | 5.966657885 |
| H | 9.155143595  | 14.601838895 | 5.375406599 |
| C | 4.674575438  | 11.376220828 | 6.302391120 |
| H | 4.821775308  | 11.400984069 | 7.378651167 |
| C | 4.167995539  | 9.523200654  | 4.693756626 |
| C | 0.436490764  | 8.867674637  | 6.629369160 |
| H | -0.237910667 | 8.123933768  | 6.222277585 |
| C | 0.772332380  | 14.829961661 | 8.509005071 |
| H | 0.196606451  | 14.961480787 | 9.416113769 |
| C | 2.989070275  | 14.296309154 | 4.928602319 |
| C | 1.633699075  | 10.997053687 | 2.386820617 |
| H | 0.957463246  | 11.172652955 | 3.213677955 |
| C | 0.382513224  | 13.848765926 | 7.565013148 |
| H | -0.482010485 | 13.229181983 | 7.763349432 |
| C | 3.242224035  | 8.546641094  | 4.192219834 |
| C | 0.120653455  | 9.545225392  | 7.769461218 |
| H | -0.810256809 | 9.347948473  | 8.285596539 |
| C | 2.011127049  | 8.382295108  | 4.813684595 |
| H | 1.314854701  | 7.650784446  | 4.420007308 |

|   |             |             |             |
|---|-------------|-------------|-------------|
| C | 4.855406374 | 7.828363043 | 2.528174624 |
| H | 5.126121776 | 7.207073207 | 1.684746767 |
| C | 3.614753335 | 7.735280230 | 3.084983900 |
| H | 2.887144360 | 7.031252277 | 2.701273275 |
| C | 5.799673078 | 8.725095479 | 3.072690938 |
| H | 6.795048392 | 8.782197753 | 2.653150150 |
| S | 6.346686796 | 7.692040046 | 6.249005089 |
| O | 5.357811313 | 6.662104314 | 6.042046841 |
| O | 6.087401089 | 8.679727600 | 7.271882142 |

**[NiL<sub>2</sub>] with two SO<sub>2</sub> on the arene site**

81

symmetry c1

|    |             |              |              |
|----|-------------|--------------|--------------|
| Ni | 5.372656613 | 12.358651625 | 3.679694634  |
| S  | 5.520119712 | 11.986940698 | 1.516112213  |
| S  | 7.524123114 | 12.787254510 | 3.861002518  |
| N  | 3.449140314 | 12.444366883 | 3.425028348  |
| N  | 5.351305269 | 12.222123122 | 5.621549274  |
| C  | 1.950514817 | 15.666860264 | 8.273875945  |
| H  | 2.275664496 | 16.418889753 | 8.982502766  |
| C  | 4.564766951 | 16.128391293 | 5.649412102  |
| C  | 1.318224962 | 10.228108629 | 1.309391269  |
| H  | 0.333354552 | 9.780553388  | 1.294236019  |
| C  | 5.880913358 | 16.027344008 | 3.183054451  |
| H  | 6.370293330 | 16.007554774 | 2.218812767  |
| C  | 2.713532661 | 15.486244443 | 7.086430578  |
| C  | 3.848375338 | 16.252321228 | 6.833037270  |
| H  | 4.167450444 | 16.982648899 | 7.567194179  |
| C  | 3.500758734 | 10.514862753 | 0.312269103  |
| H  | 4.205982184 | 10.305578326 | -0.481543803 |
| C  | 4.156790316 | 15.160826910 | 4.668898133  |
| C  | 3.813258257 | 10.332695813 | 5.797025149  |
| C  | 2.221761025 | 9.982853204  | 0.275402160  |

|   |             |              |              |
|---|-------------|--------------|--------------|
| H | 1.930542191 | 9.352642212  | -0.555747307 |
| C | 2.975184442 | 11.580429815 | 2.402120846  |
| C | 1.015237040 | 10.575375176 | 8.258361463  |
| H | 0.758953086 | 11.125948739 | 9.154173089  |
| C | 3.908684500 | 11.310609273 | 1.387514489  |
| C | 6.257694889 | 13.119195979 | 6.247664403  |
| C | 2.202593442 | 10.823909484 | 7.633339657  |
| H | 2.851917777 | 11.588566058 | 8.033073616  |
| C | 1.662088519 | 9.143497054  | 5.942126074  |
| C | 2.654835664 | 13.268677587 | 4.012702808  |
| H | 1.595721643 | 13.214178950 | 3.769274023  |
| C | 2.586382481 | 10.110642154 | 6.464775059  |
| C | 2.306213560 | 14.492157554 | 6.132168388  |
| C | 1.152730064 | 13.718763692 | 6.436826838  |
| H | 0.846791312 | 12.926556510 | 5.768970007  |
| C | 6.065327391 | 13.650607218 | 7.516897172  |
| H | 5.160700874 | 13.426486439 | 8.067481694  |
| C | 5.675591242 | 16.974558398 | 5.377283279  |
| H | 5.982070426 | 17.674106797 | 6.144109326  |
| C | 7.379929929 | 13.457600548 | 5.475168962  |
| C | 8.138461694 | 14.846407923 | 7.302967559  |
| H | 8.871259522 | 15.532616510 | 7.709156744  |
| C | 4.824399043 | 15.185689493 | 3.410013531  |
| H | 4.507432888 | 14.530525645 | 2.615586746  |

|   |              |              |             |
|---|--------------|--------------|-------------|
| C | 6.329814144  | 16.917297695 | 4.182688949 |
| H | 7.174506924  | 17.564328628 | 3.987254012 |
| C | 7.003007245  | 14.525695818 | 8.045202343 |
| H | 6.841454326  | 14.967538855 | 9.019533548 |
| C | 5.485977815  | 9.521860751  | 4.134589442 |
| H | 6.249281066  | 10.168139829 | 4.537108095 |
| C | 8.327774193  | 14.319021601 | 6.034575112 |
| H | 9.200038865  | 14.588061188 | 5.453236301 |
| C | 4.708943547  | 11.356160967 | 6.323320266 |
| H | 4.850062038  | 11.372683198 | 7.400861302 |
| C | 4.178930717  | 9.522582585  | 4.699803714 |
| C | 0.420098805  | 8.936135118  | 6.604179244 |
| H | -0.265017041 | 8.205811876  | 6.190841958 |
| C | 0.830695074  | 14.924920105 | 8.509619144 |
| H | 0.249110746  | 15.079346695 | 9.409351889 |
| C | 3.067422756  | 14.303803088 | 4.954682354 |
| C | 1.694981680  | 11.038266392 | 2.369891136 |
| H | 1.011784132  | 11.206940375 | 3.192492613 |
| C | 0.430007300  | 13.940826109 | 7.573892245 |
| H | -0.449255334 | 13.341819477 | 7.771194342 |
| C | 3.235819964  | 8.570522397  | 4.183459696 |
| C | 0.105179524  | 9.623617694  | 7.738432687 |
| H | -0.835880884 | 9.447884883  | 8.243647886 |
| C | 1.999665874  | 8.423522054  | 4.799656879 |

|   |             |              |             |
|---|-------------|--------------|-------------|
| H | 1.291440603 | 7.709185865  | 4.396214345 |
| C | 4.835239582 | 7.852058420  | 2.506904709 |
| H | 5.093834539 | 7.243112003  | 1.650832353 |
| C | 3.593998120 | 7.769640529  | 3.064284354 |
| H | 2.854140993 | 7.084857345  | 2.669615960 |
| C | 5.797487380 | 8.718040605  | 3.069322428 |
| H | 6.793796549 | 8.763061962  | 2.650474429 |
| S | 2.950668602 | 17.389554130 | 2.537817720 |
| O | 3.034201548 | 18.221802297 | 3.713381878 |
| O | 3.499420535 | 17.897122749 | 1.304807768 |
| S | 6.180464189 | 7.523649919  | 6.242046911 |
| O | 5.202447889 | 6.508783895  | 5.933297562 |
| O | 5.877252875 | 8.450481941  | 7.308919268 |
